# Supplementary material for: Synthesis and characterization of bifunctional dendrimers: preliminary use for the coating of gold surfaces and the proliferation of human osteoblasts (HOB)
Source: Royal Society of Chemistry journal article supplement (doi:10.1039/c5nj00620a), 2015-01-01

## Supporting Information

### Synthesis and characterization of bifunctional dendrimers. Preliminary use for the coating of gold surfaces and the proliferation of human osteoblasts (HOB).

Edwin R. de Jong, Nicole Deloch, Wolfgang Knoll, Cédric-Olivier Turrin, Jean-Pierre Majoral,  
Anne-Marie Caminade,\* Ingo Köper\*

### NMR spectra of all compounds

#### <sup>1</sup>H NMR spectrum of compound 1

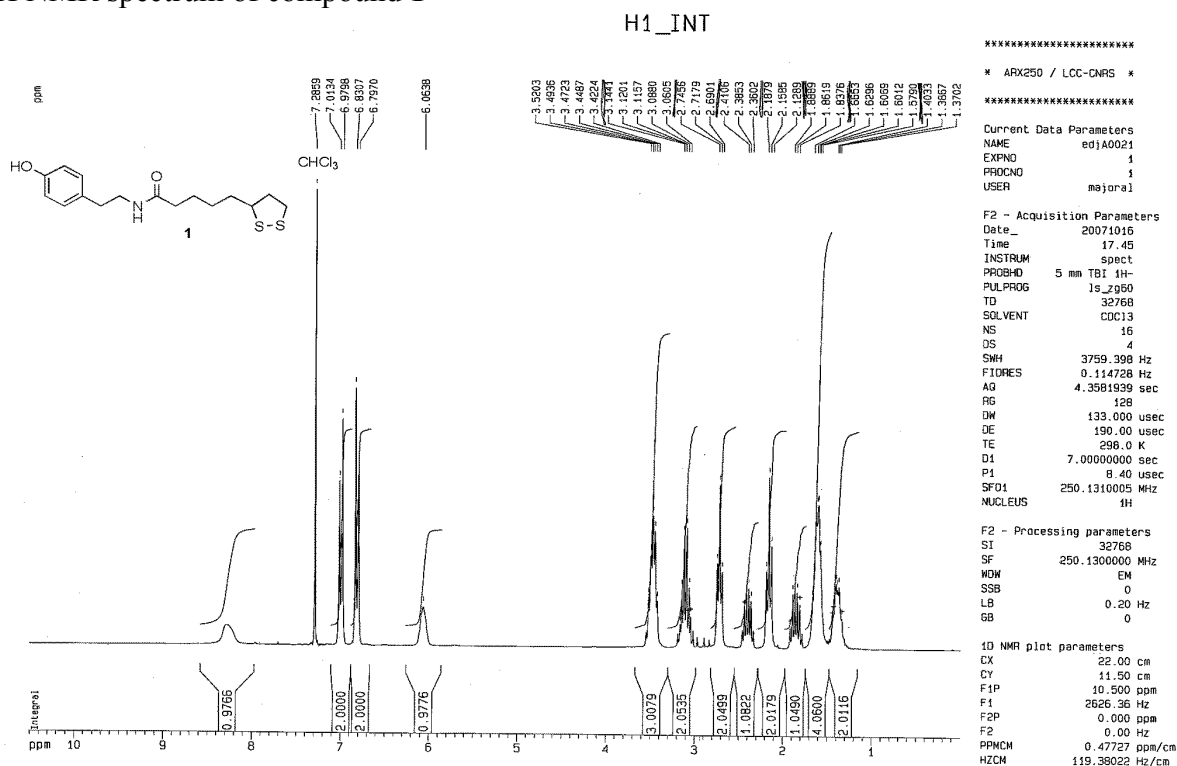

# <sup>13</sup>C {<sup>1</sup>H} NMR spectrum of compound 1

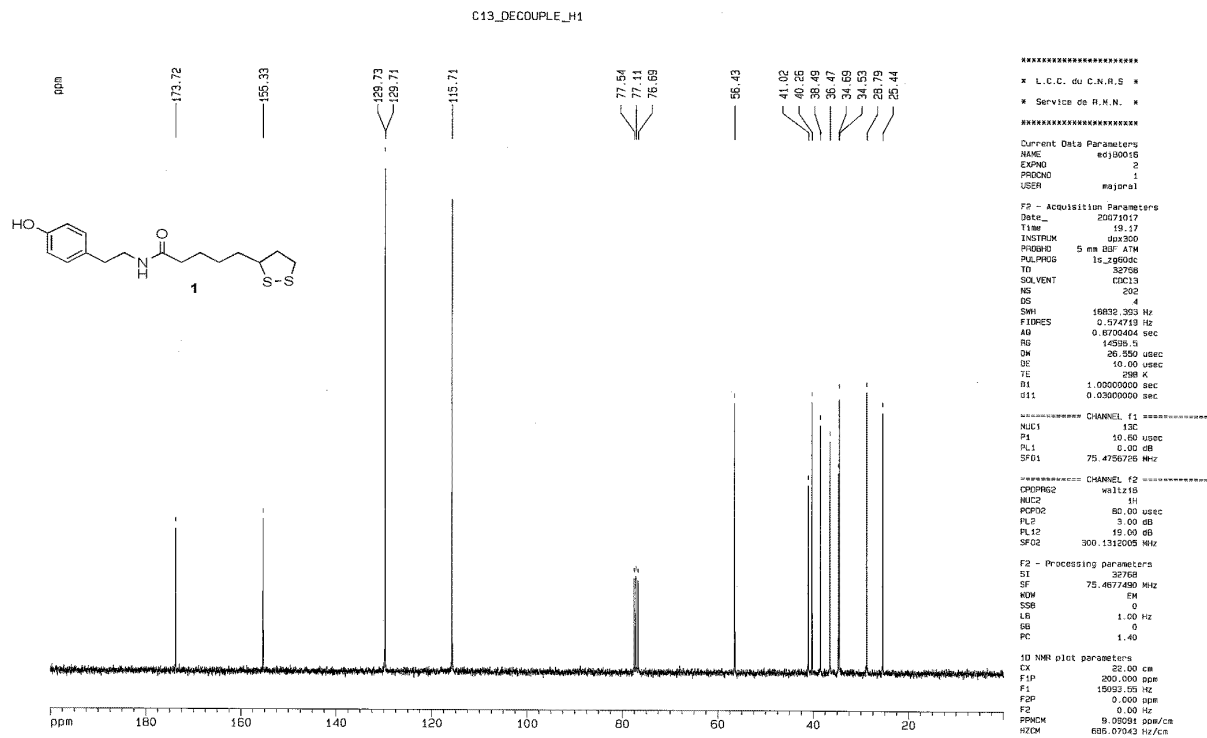

# <sup>13</sup>C Jmod NMR spectrum of compound 1

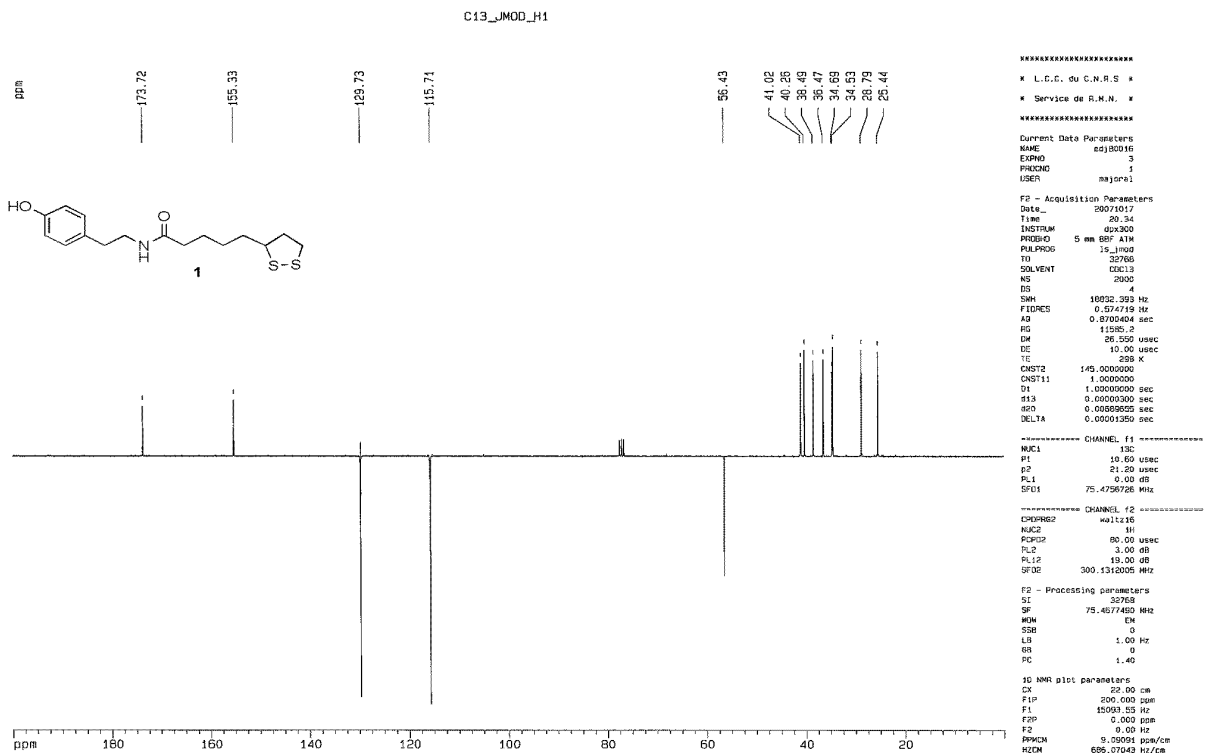

<sup>31</sup>P {<sup>1</sup>H} NMR spectrum of compound **2**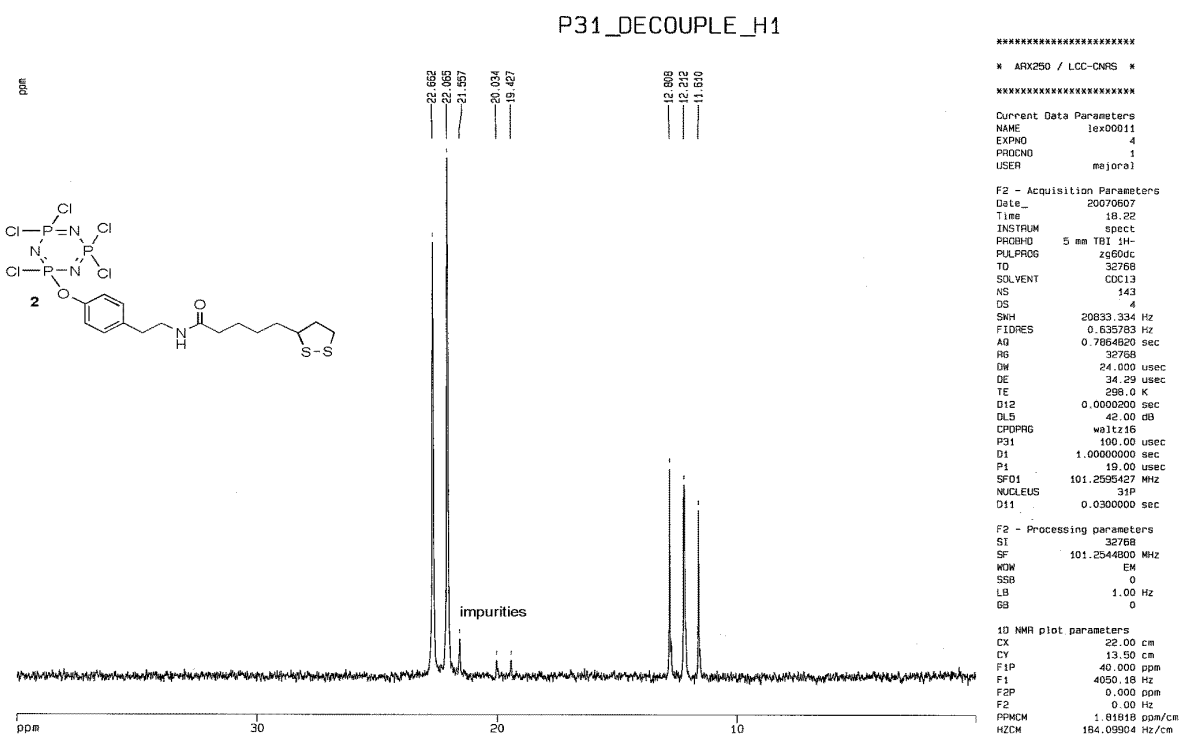

<sup>1</sup>H NMR spectrum of compound **2**

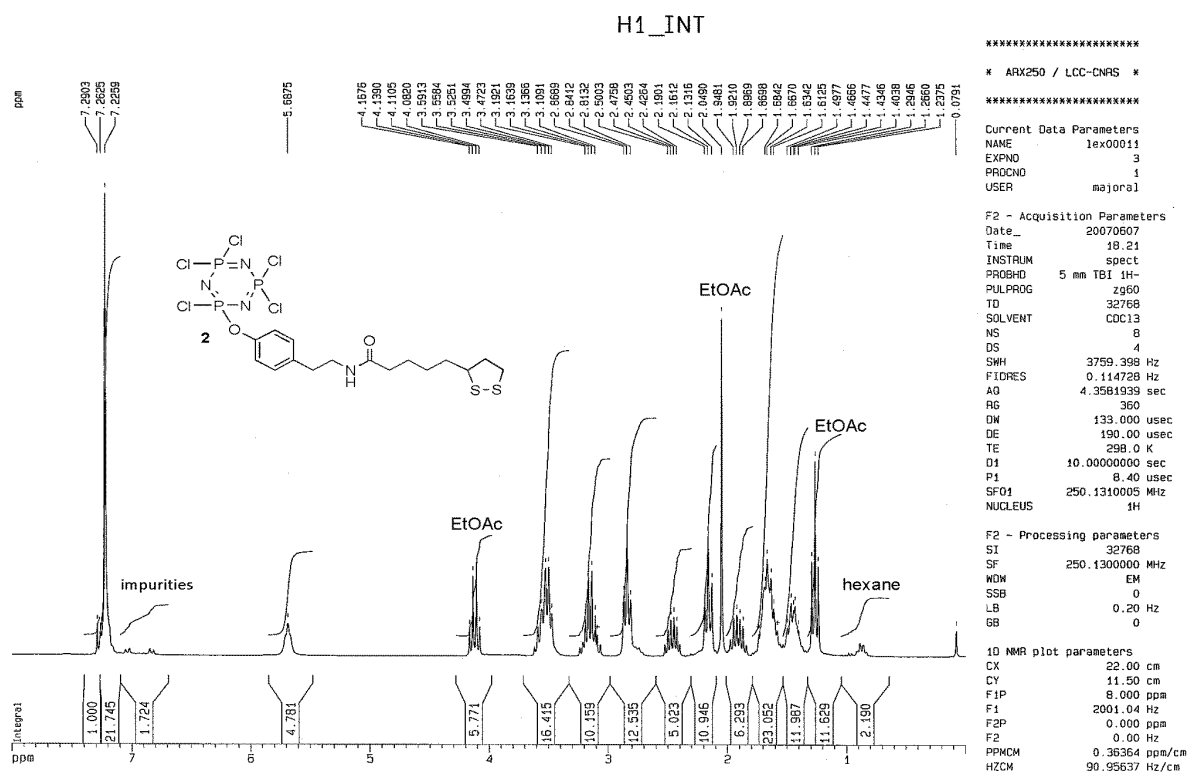

$^{31}\text{P}$   $\{^1\text{H}\}$  NMR spectrum of compound **3**

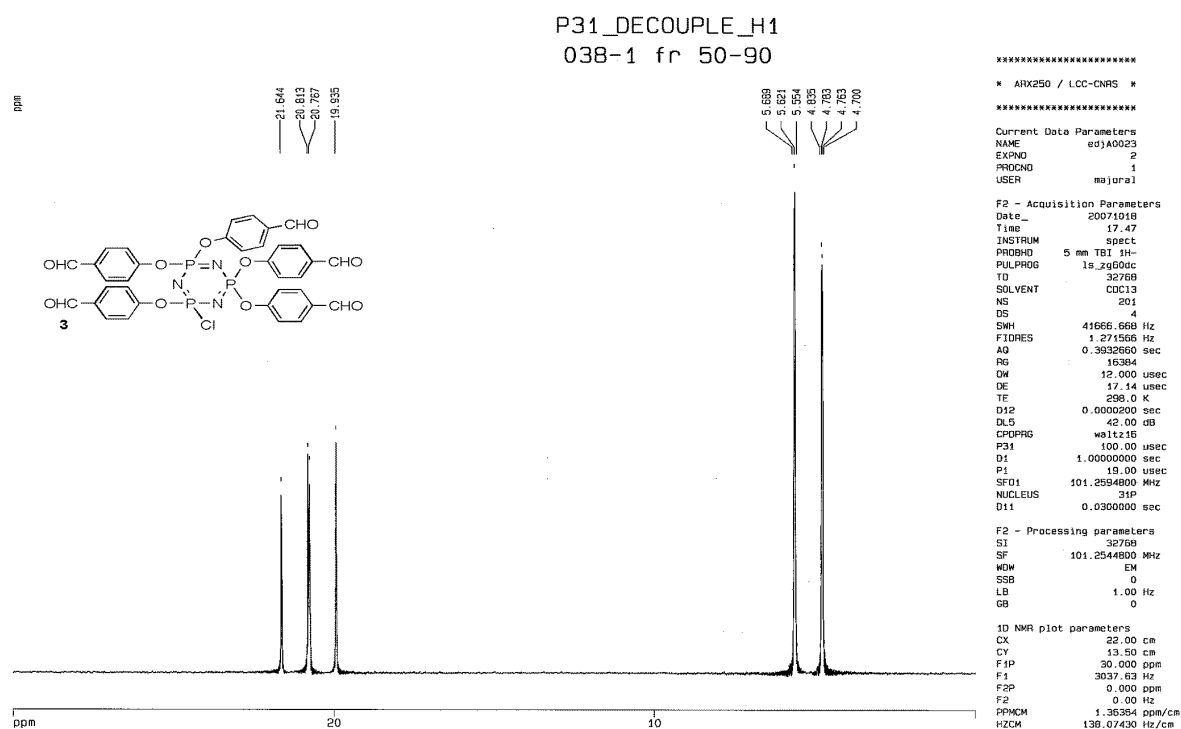

$^{31}\text{P}$   $\{^1\text{H}\}$  NMR spectrum of compound **4-G<sub>0</sub>**

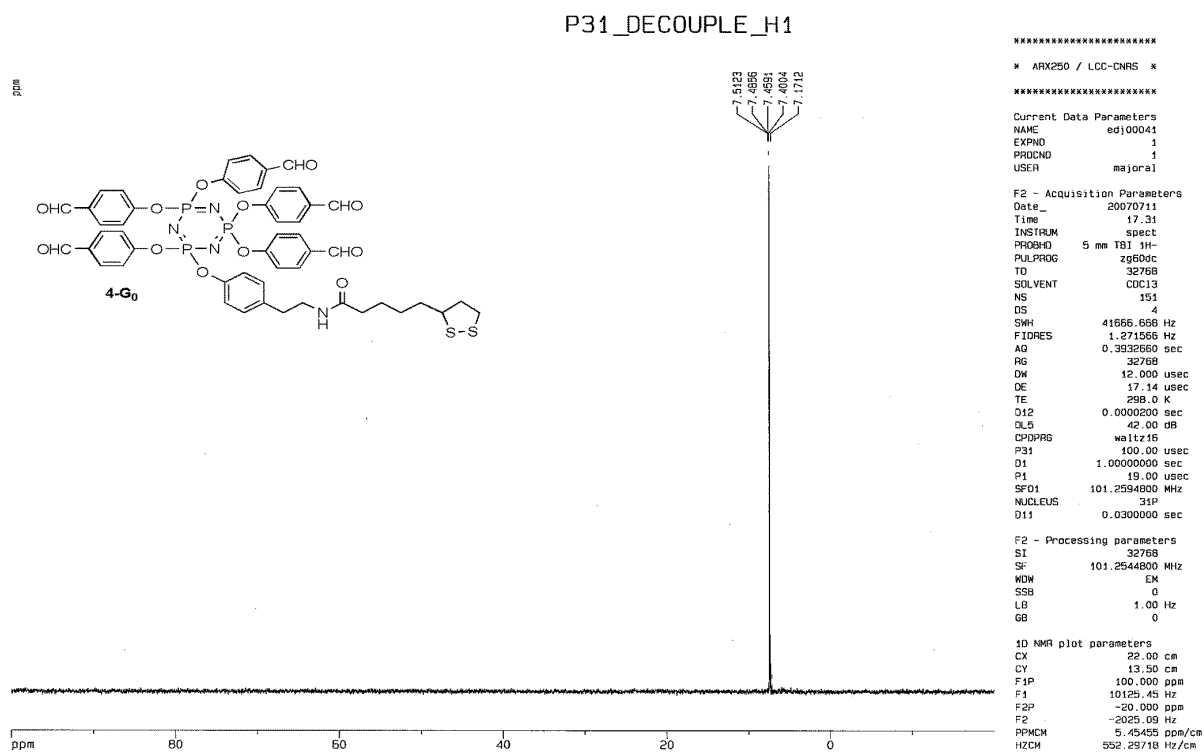

# <sup>1</sup>H NMR spectrum of compound 4-G<sub>0</sub>

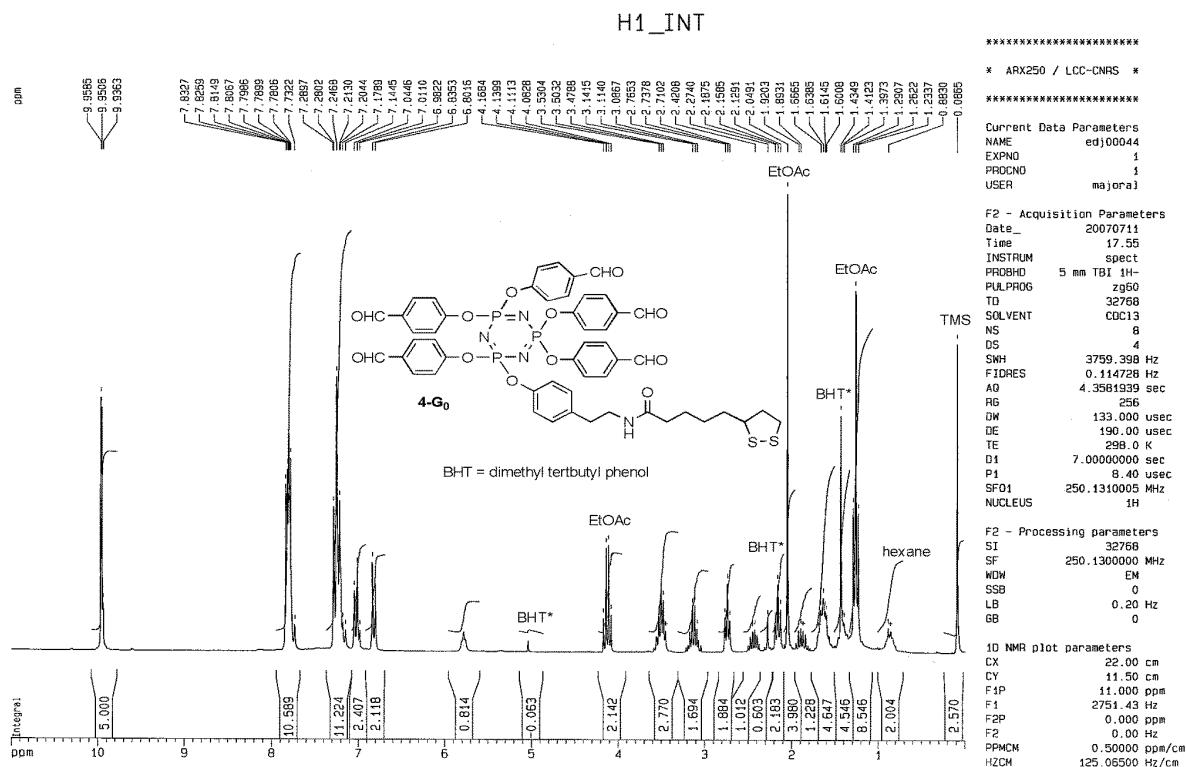

# <sup>13</sup>C {<sup>1</sup>H} NMR spectrum of compound 4-G<sub>0</sub>

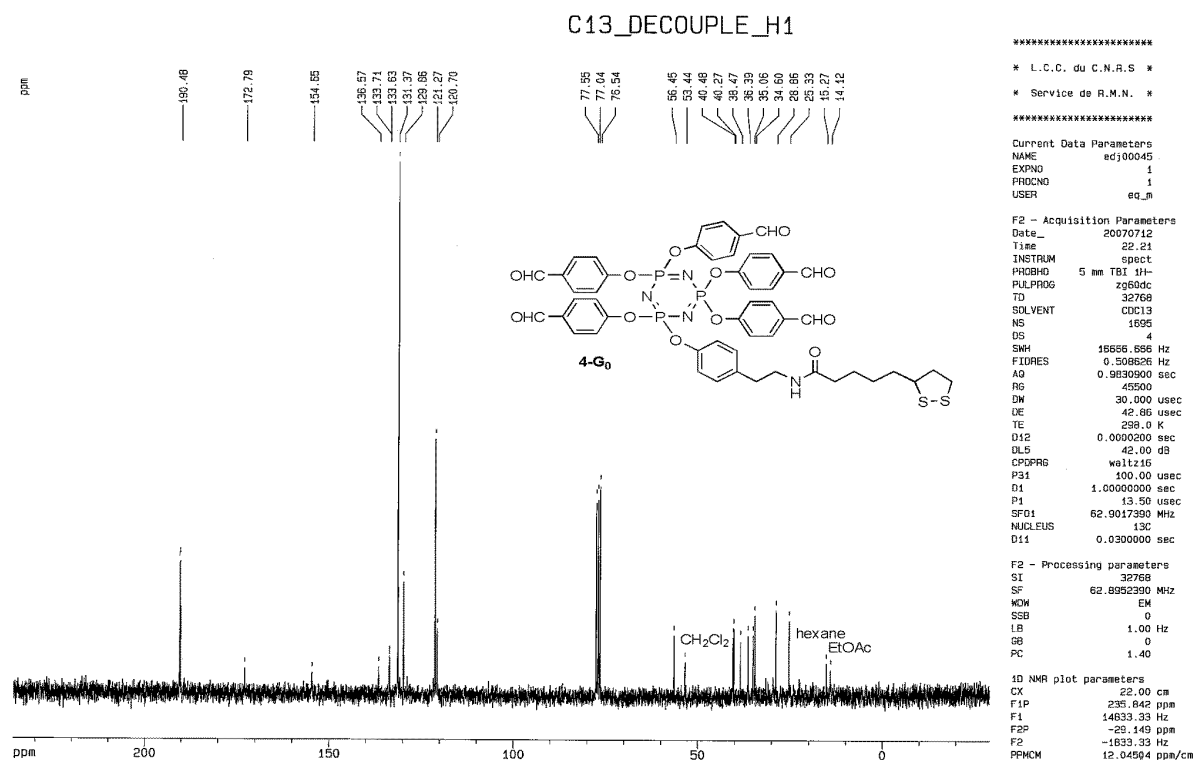

$^{31}\text{P}$   $\{^1\text{H}\}$  NMR spectrum of compound **4-G<sub>1</sub>**

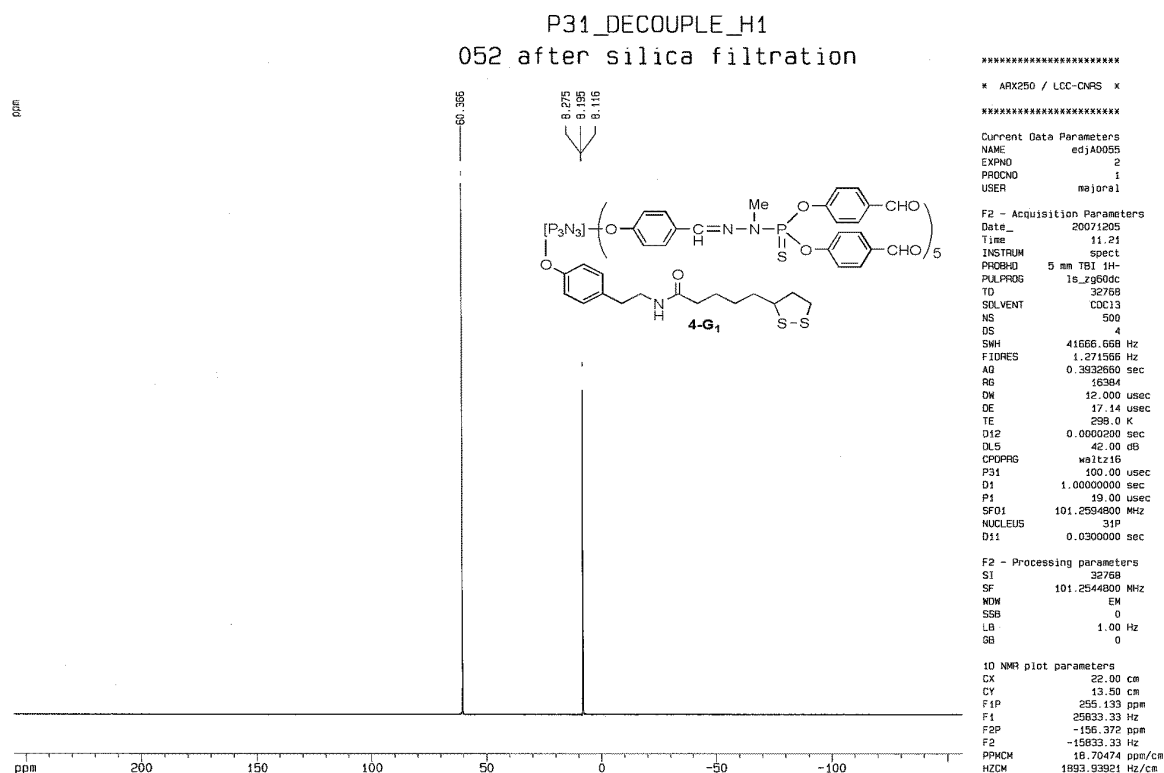

$^1\text{H}$  NMR spectrum of compound **4-G<sub>1</sub>**

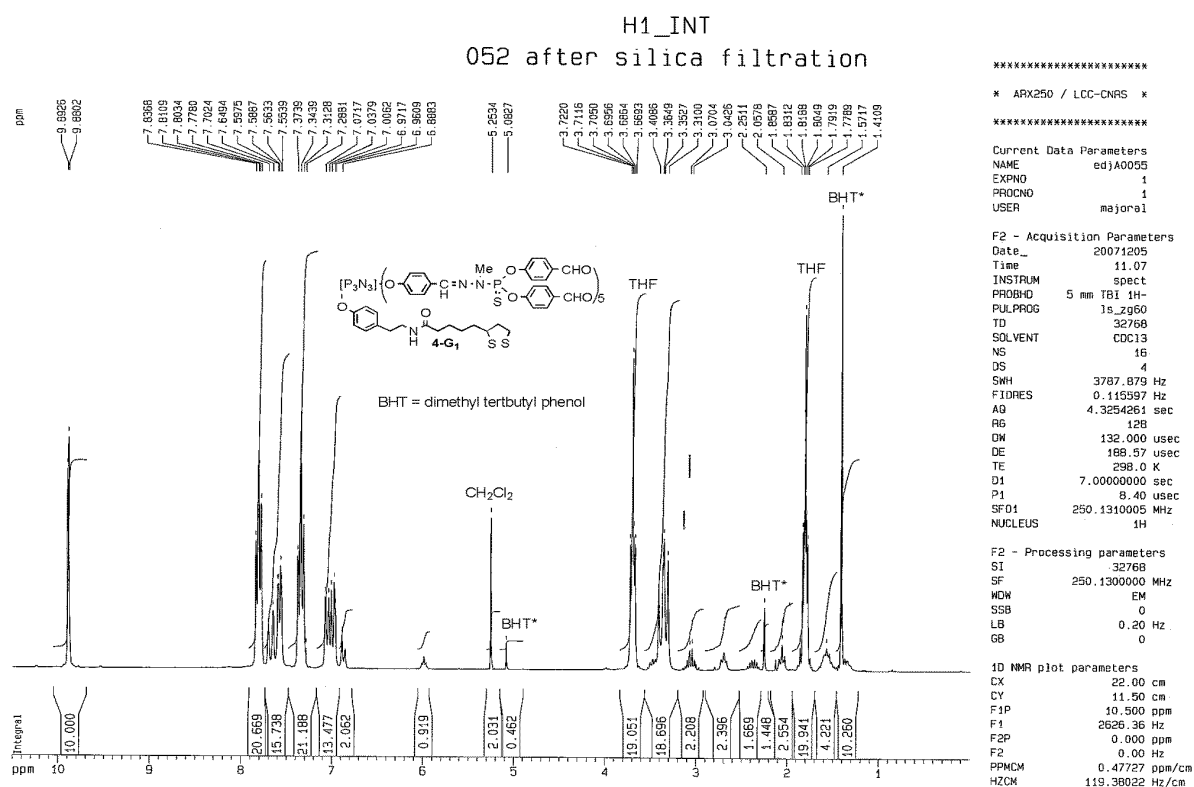

$^{13}\text{C} \{^1\text{H}\}$  NMR spectrum of compound **4-G<sub>1</sub>**

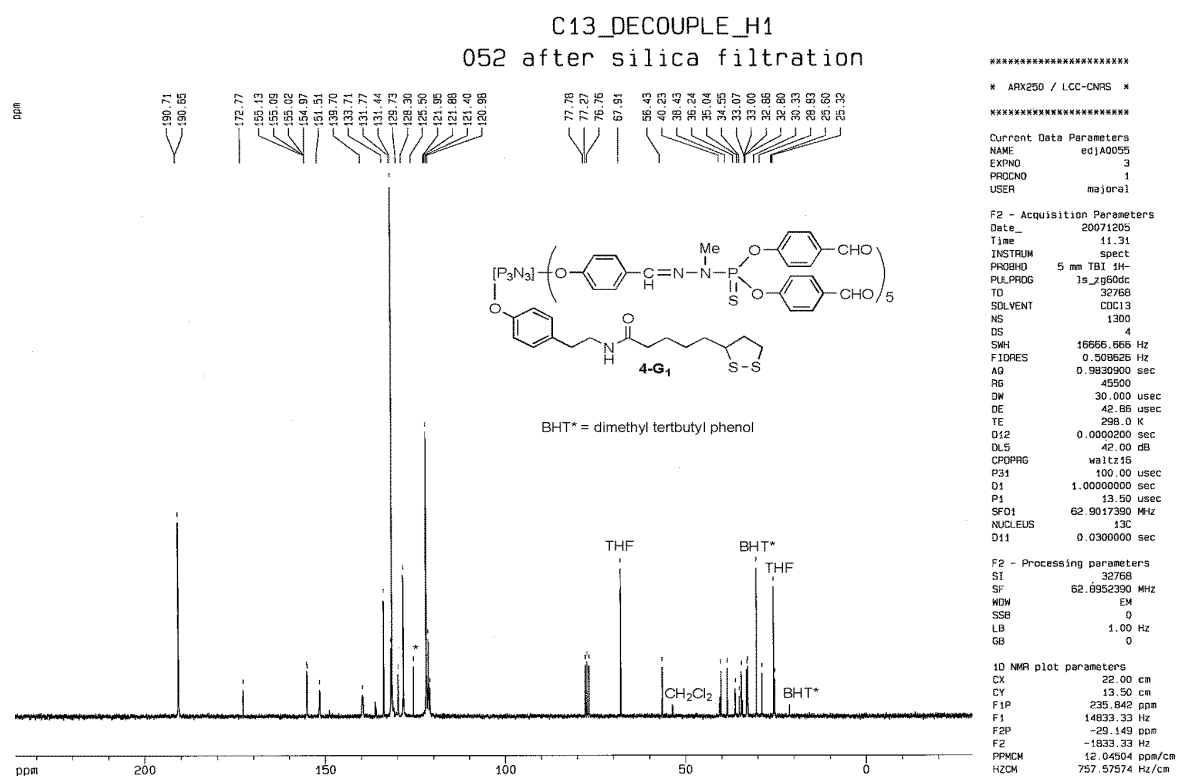

$^{31}\text{P} \{^1\text{H}\}$  NMR spectrum of compound **4-G<sub>2</sub>**

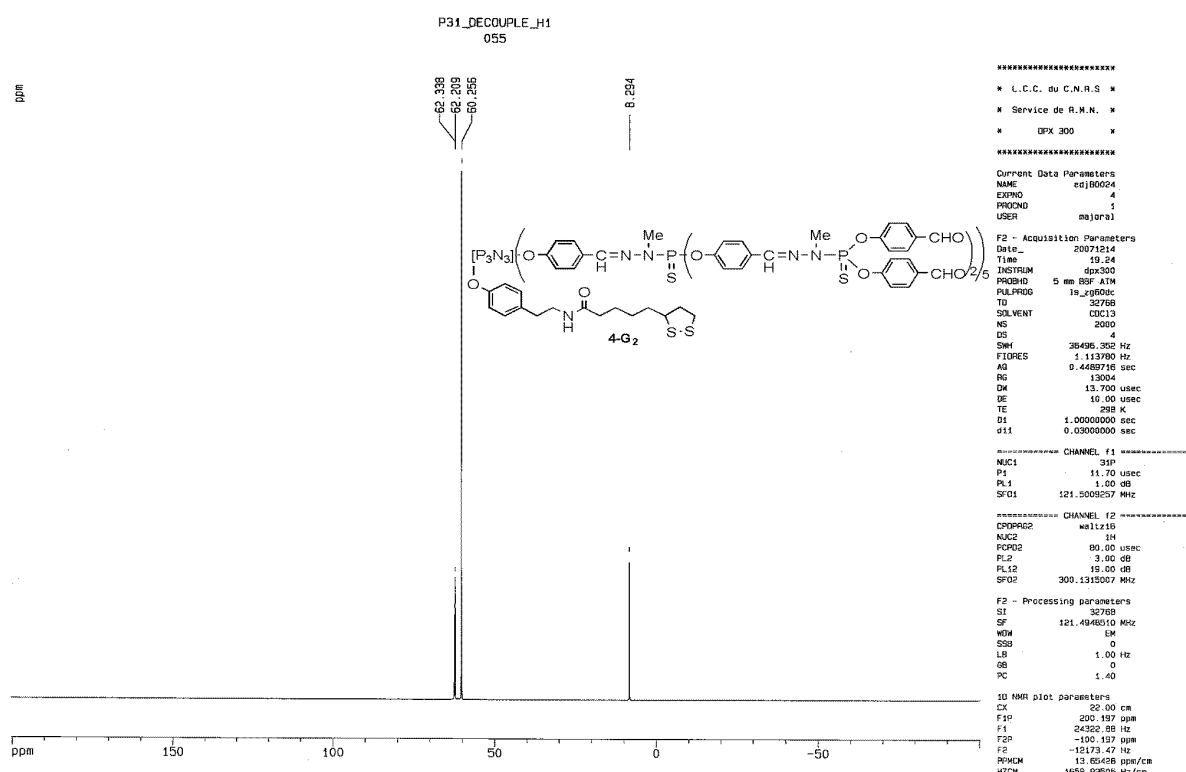

# <sup>1</sup>H NMR spectrum of compound 4-G<sub>2</sub>

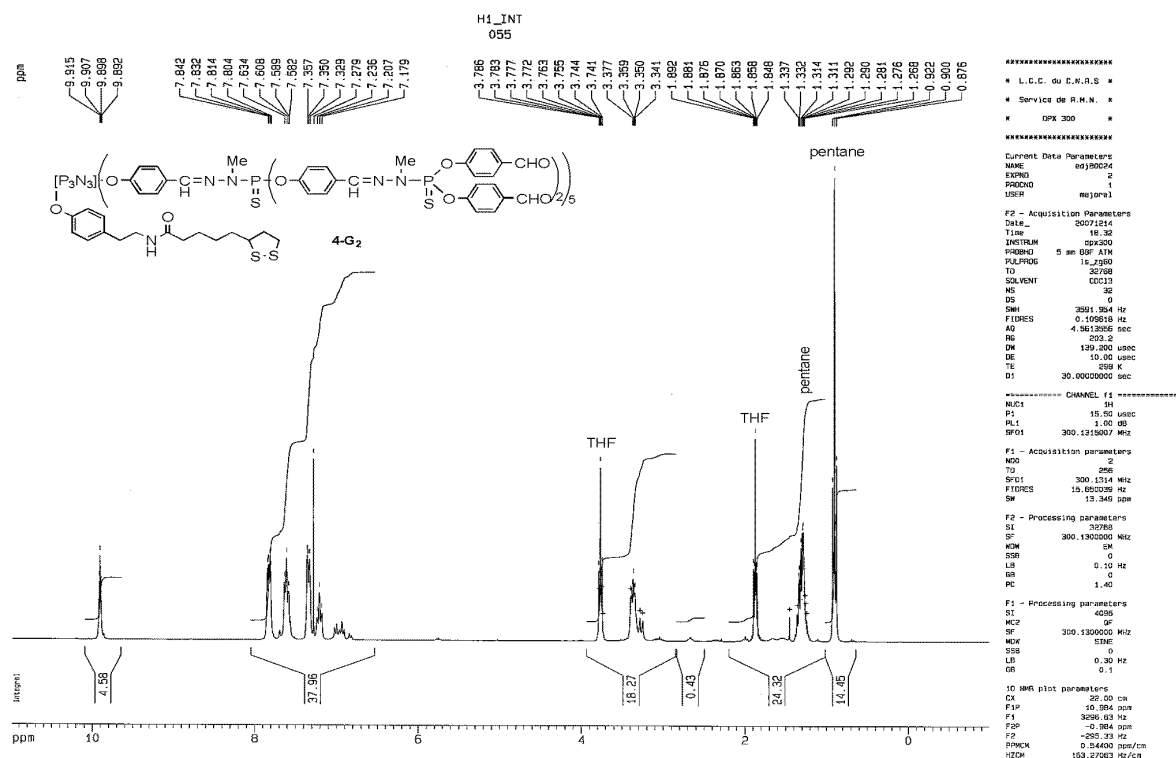

# <sup>13</sup>C {<sup>1</sup>H} NMR spectrum of compound 4-G<sub>2</sub>

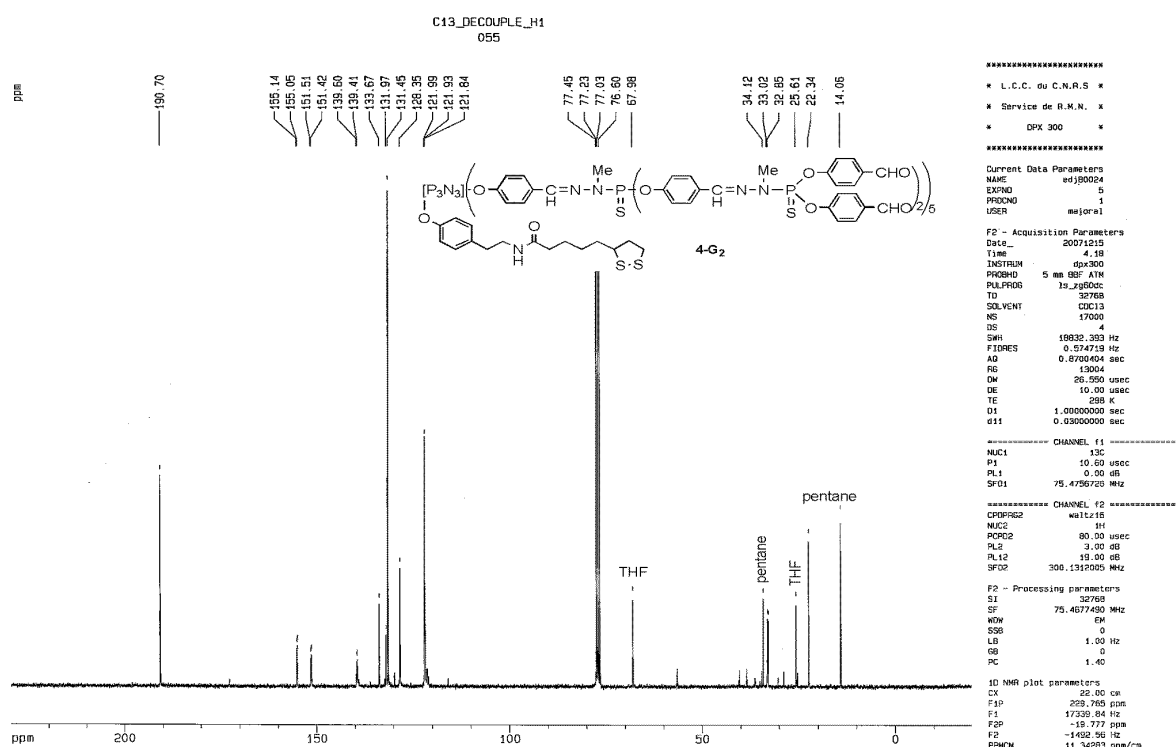



# <sup>13</sup>C Jmod NMR spectrum of compound 4-G<sub>2</sub>

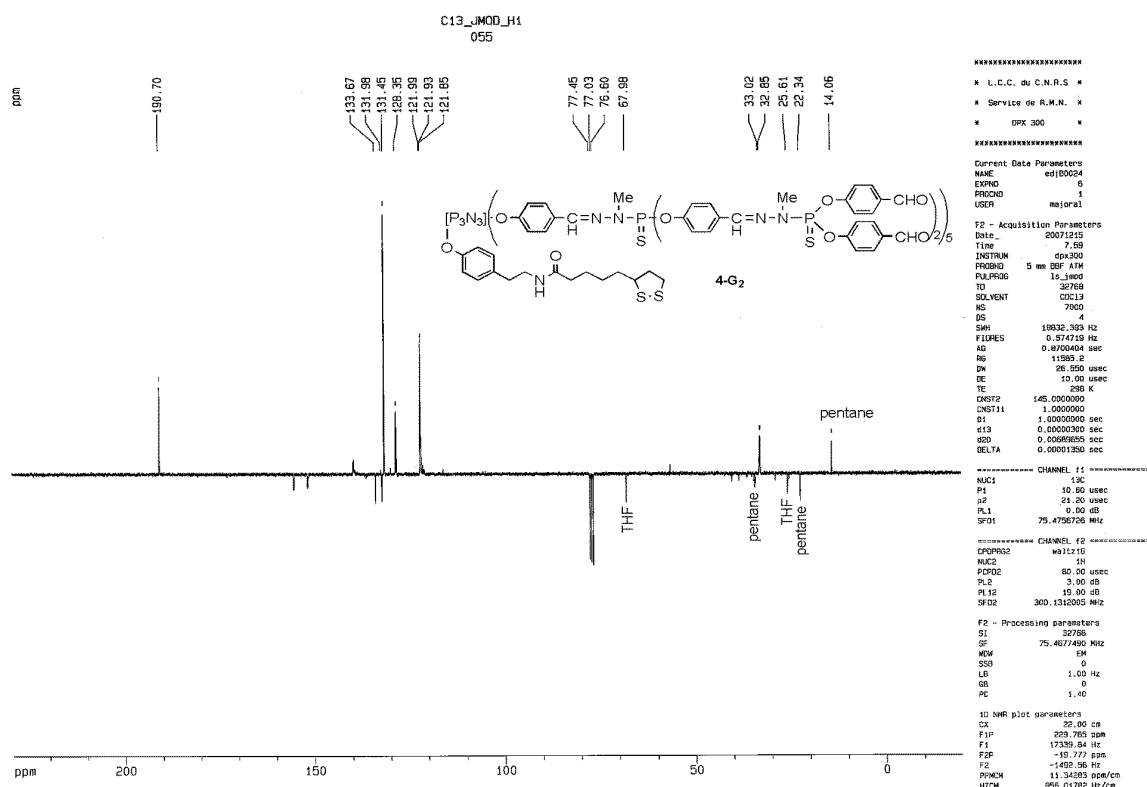

# <sup>31</sup>P {<sup>1</sup>H} NMR spectrum of compound 5-G<sub>1</sub>

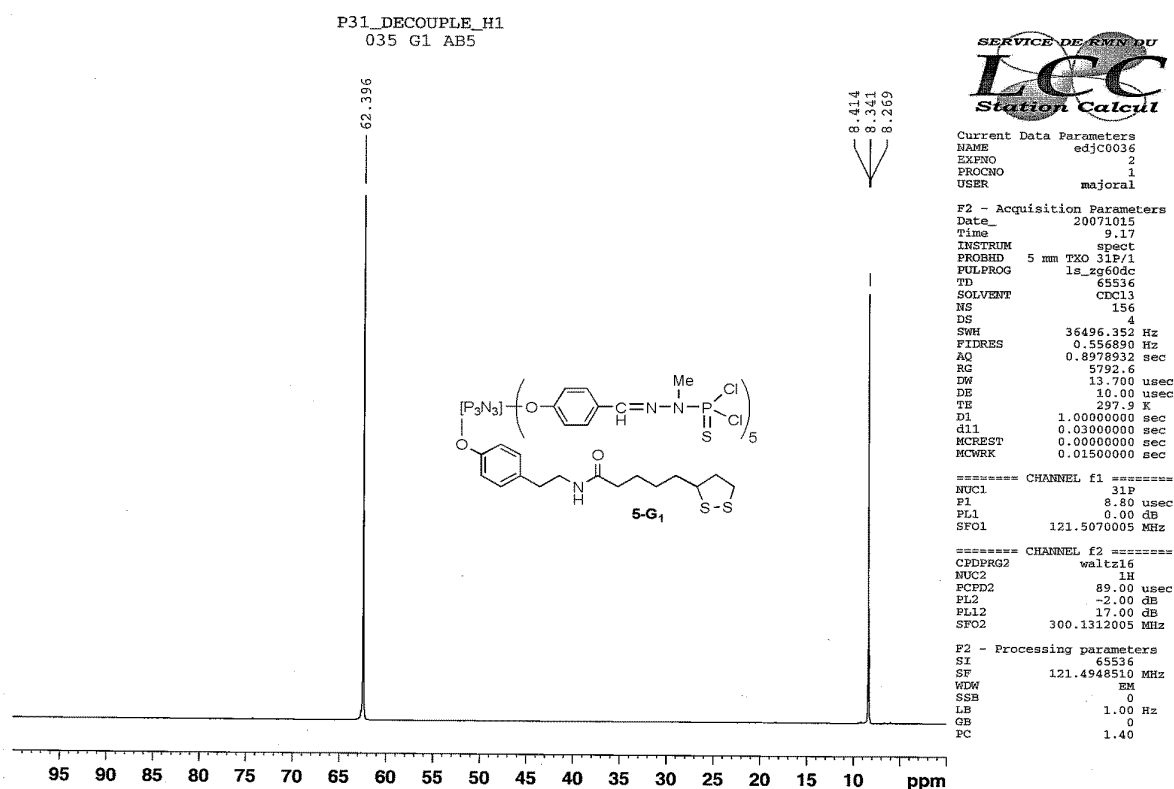

# <sup>1</sup>H NMR spectrum of compound 5-G<sub>1</sub>

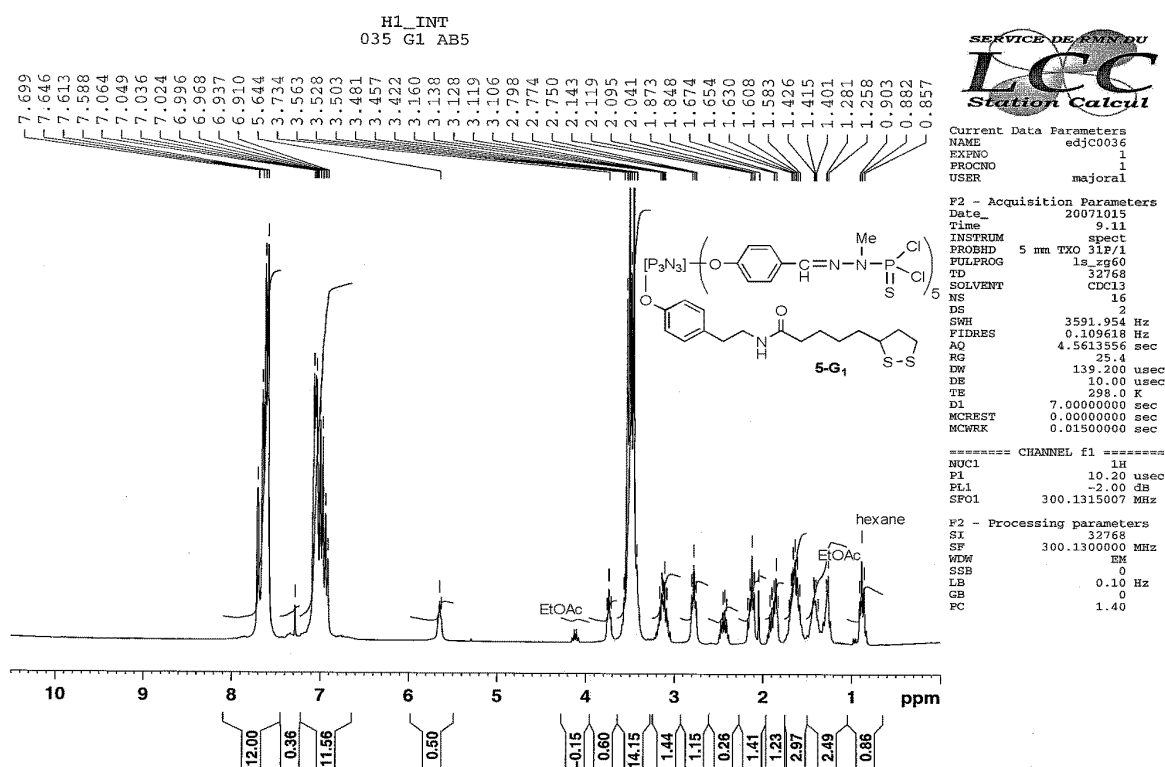

# <sup>13</sup>C {<sup>1</sup>H} NMR spectrum of compound 5-G<sub>1</sub>

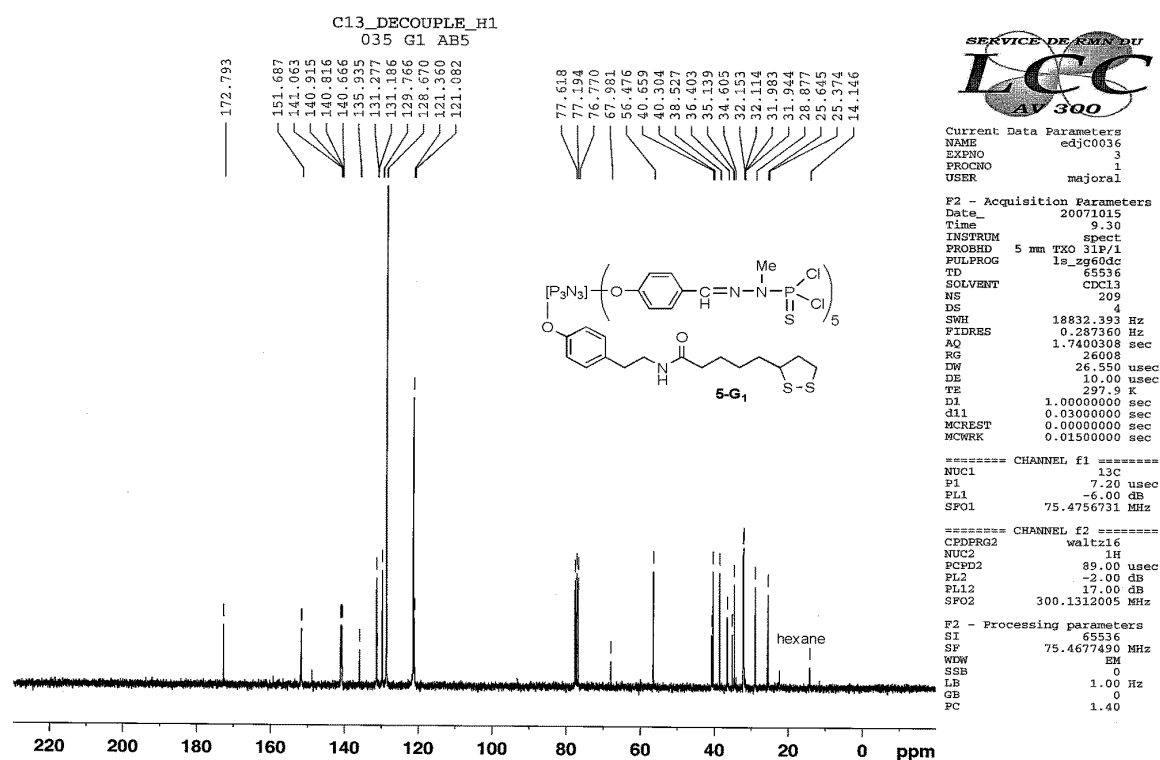

# <sup>31</sup>P {<sup>1</sup>H} NMR spectrum of compound **5-G<sub>2</sub>**

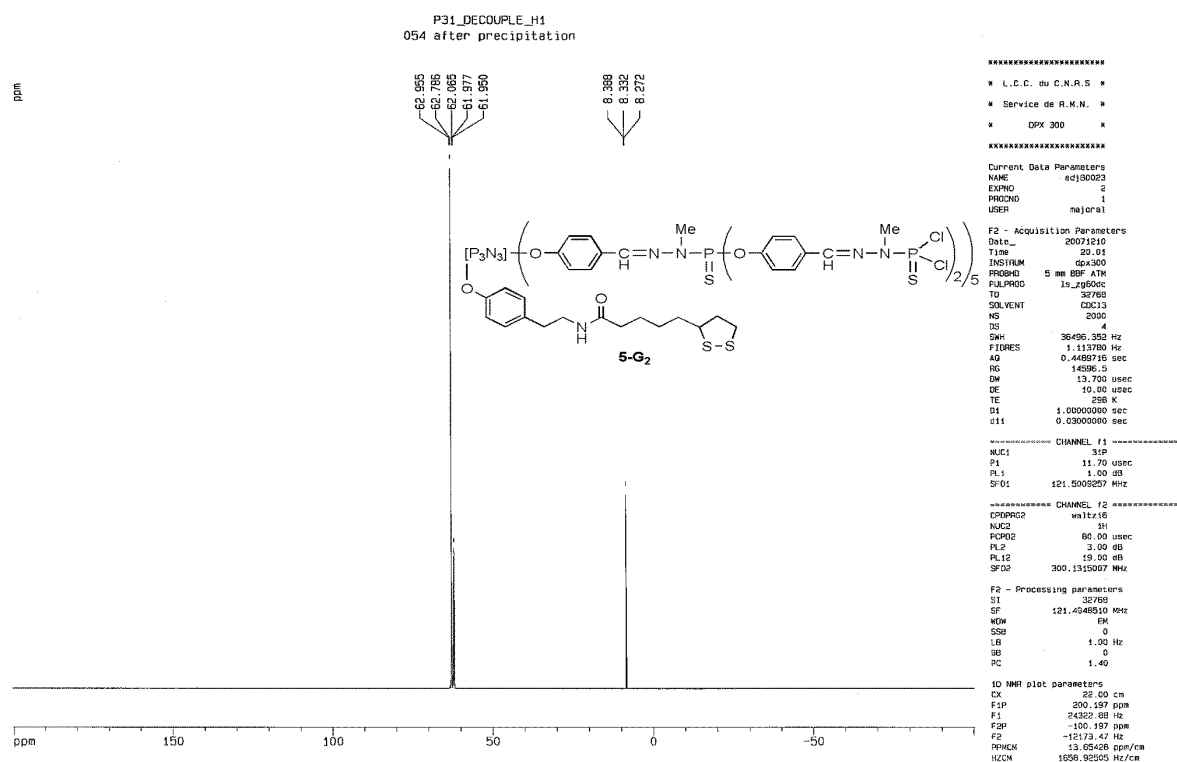

# <sup>1</sup>H NMR spectrum of compound **5-G<sub>2</sub>**

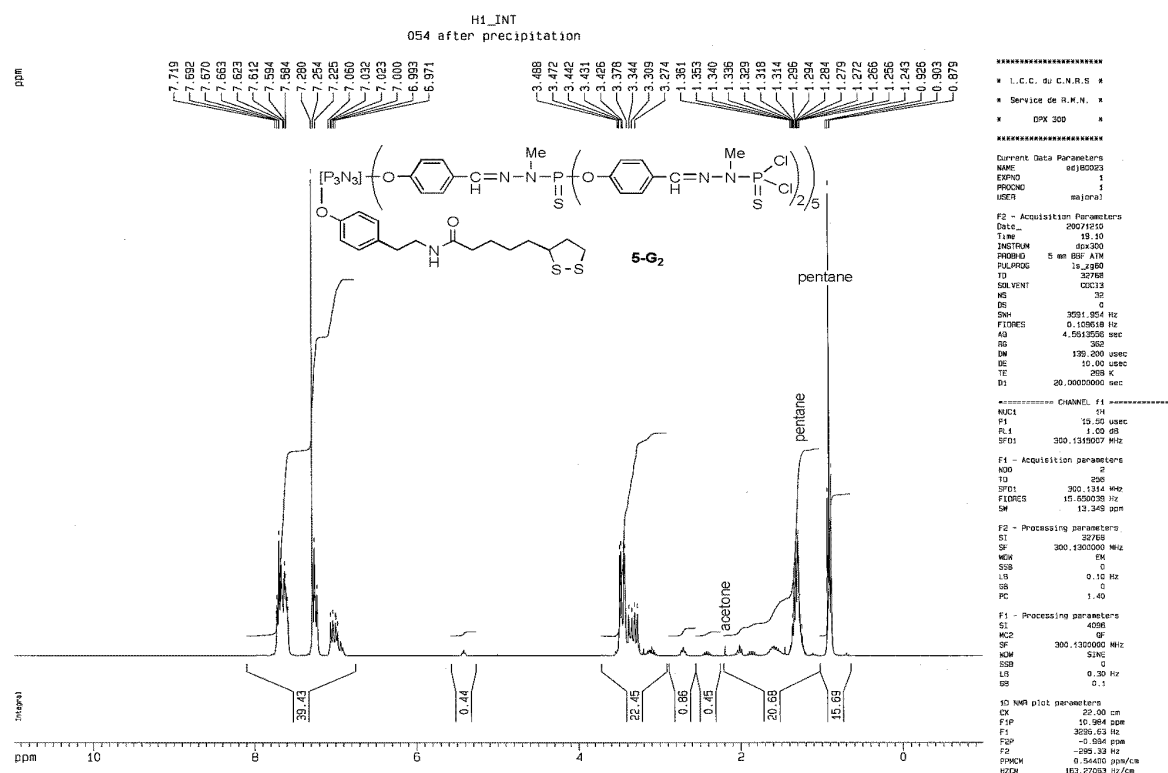

# <sup>13</sup>C {<sup>1</sup>H} NMR spectrum of compound **5-G<sub>2</sub>**

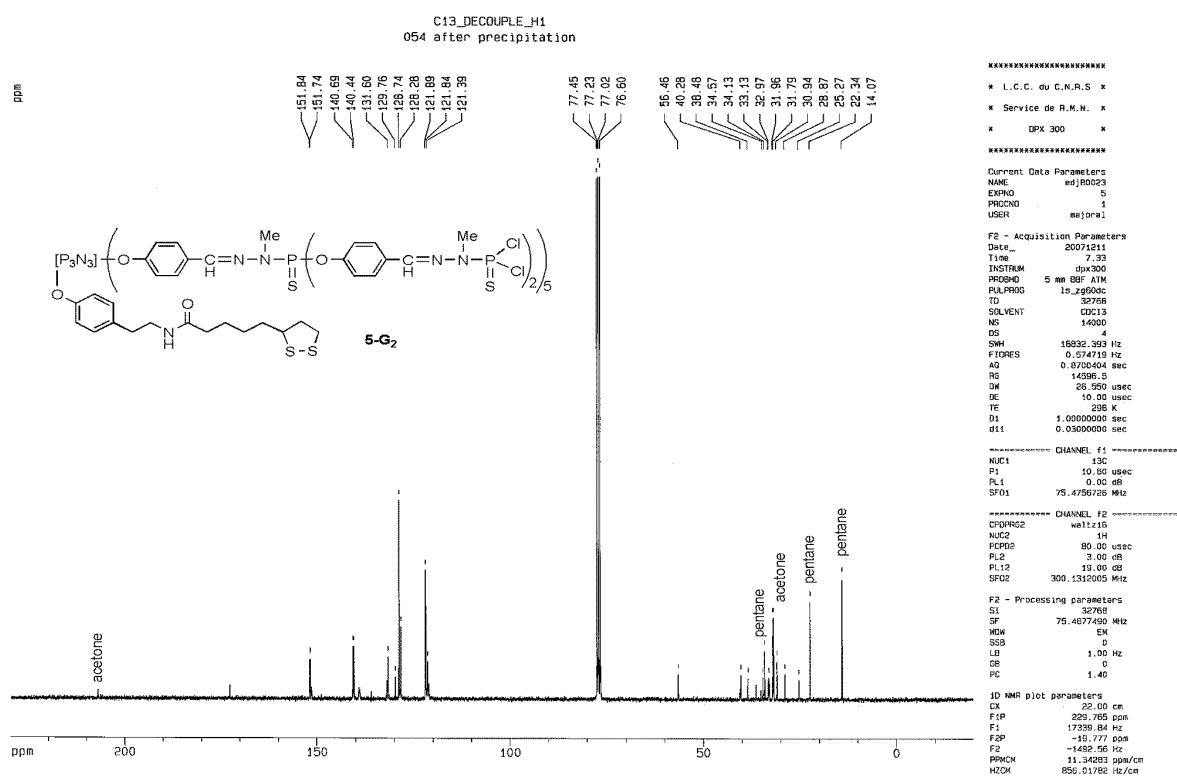

# <sup>13</sup>C Jmod NMR spectrum of compound **5-G<sub>2</sub>**

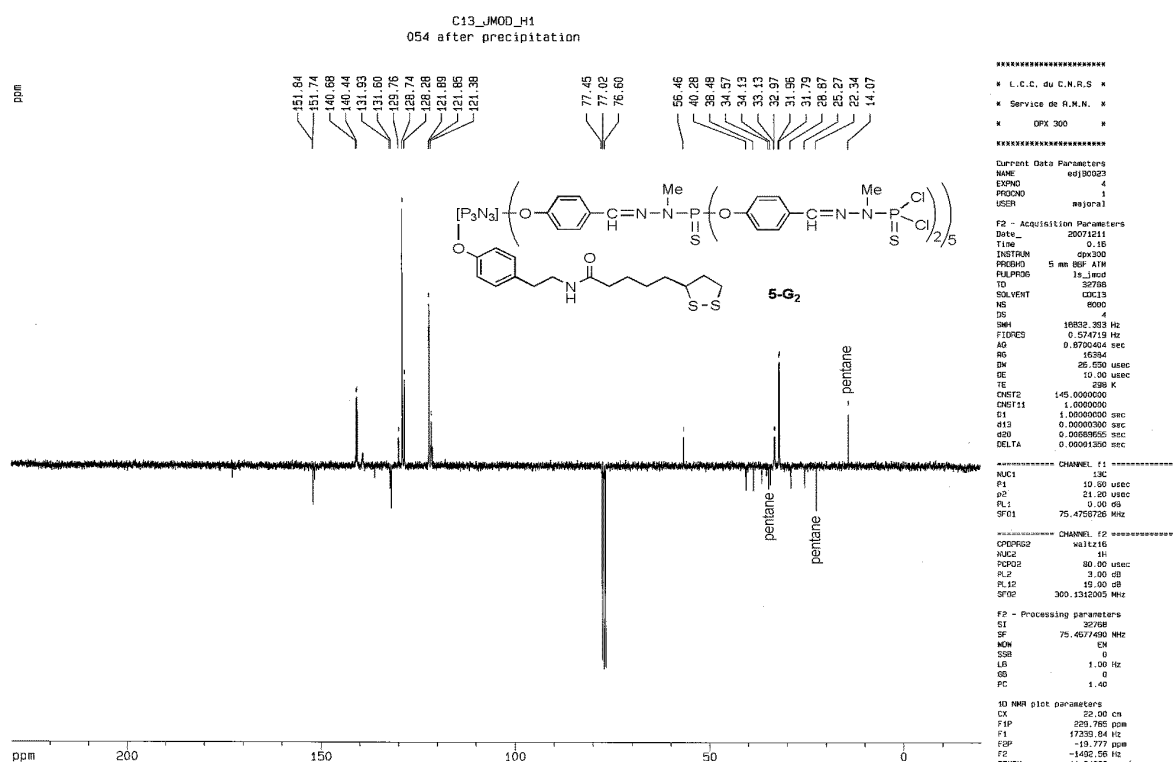

$^{31}\text{P}$   $\{^1\text{H}\}$  NMR spectrum of compound **6-G<sub>1</sub>**

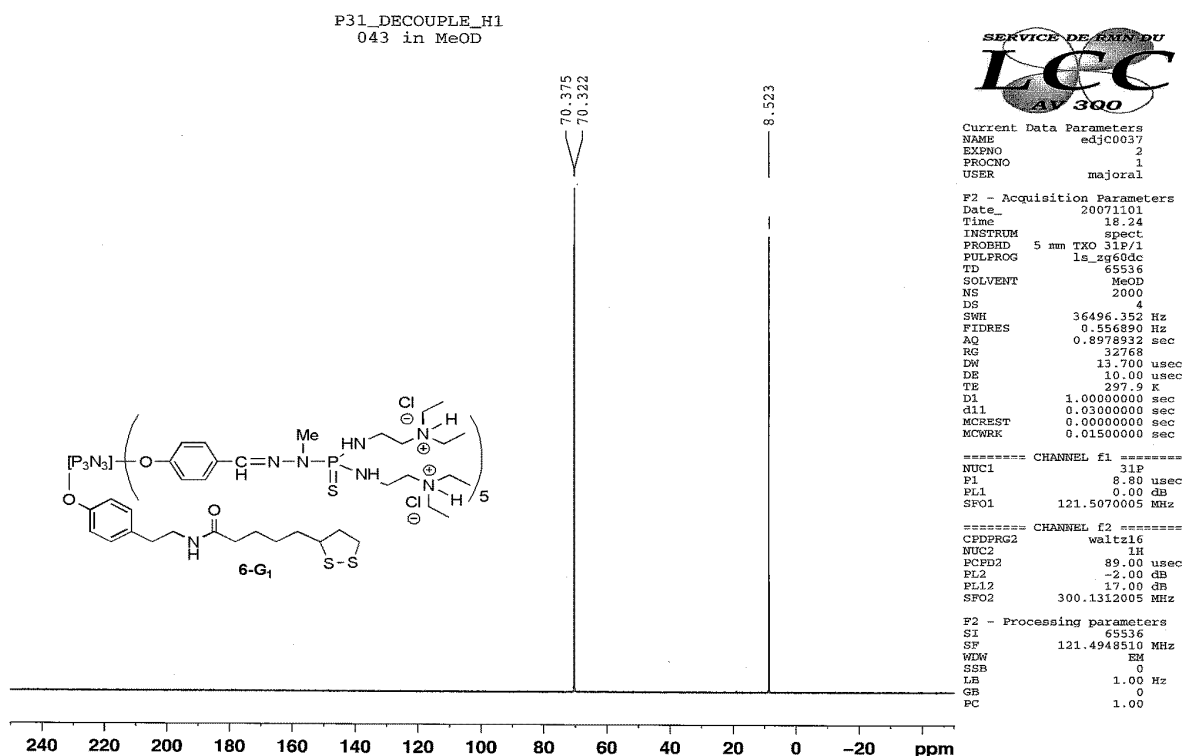

$^1\text{H}$  NMR spectrum of compound **6-G<sub>1</sub>**

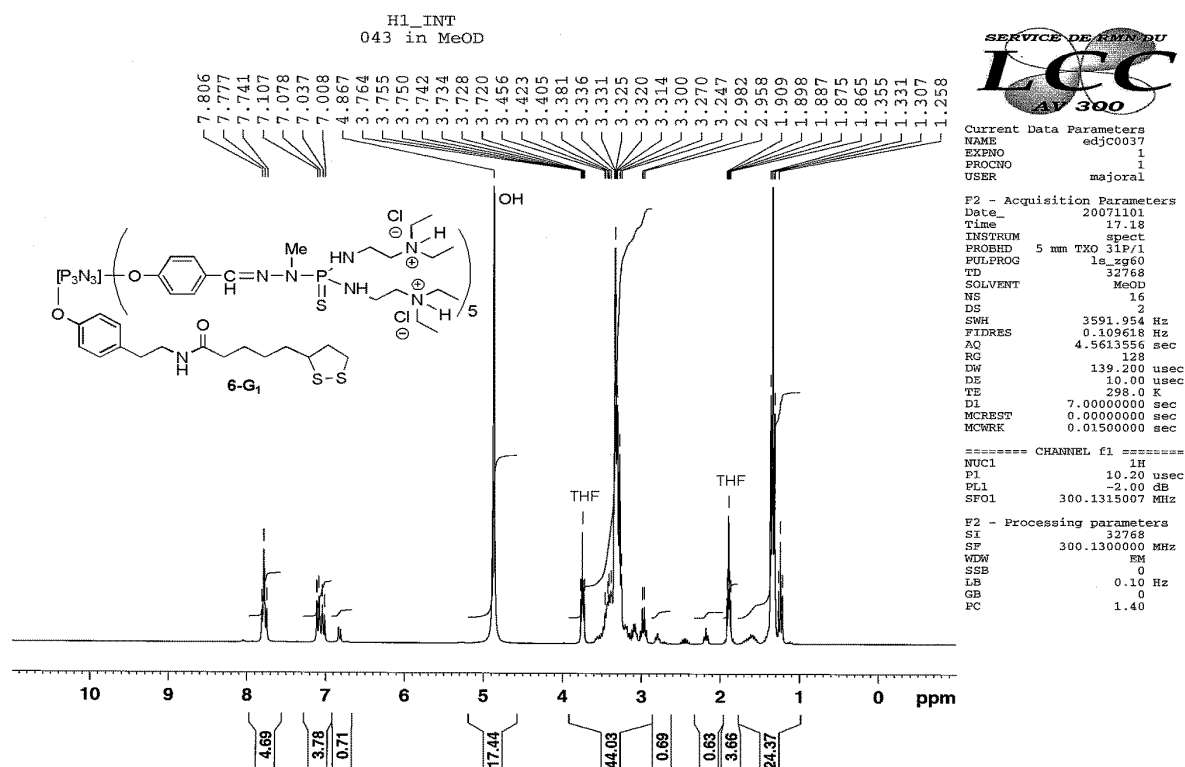

<sup>13</sup>C Jmod NMR spectrum of compound **6-G<sub>1</sub>**

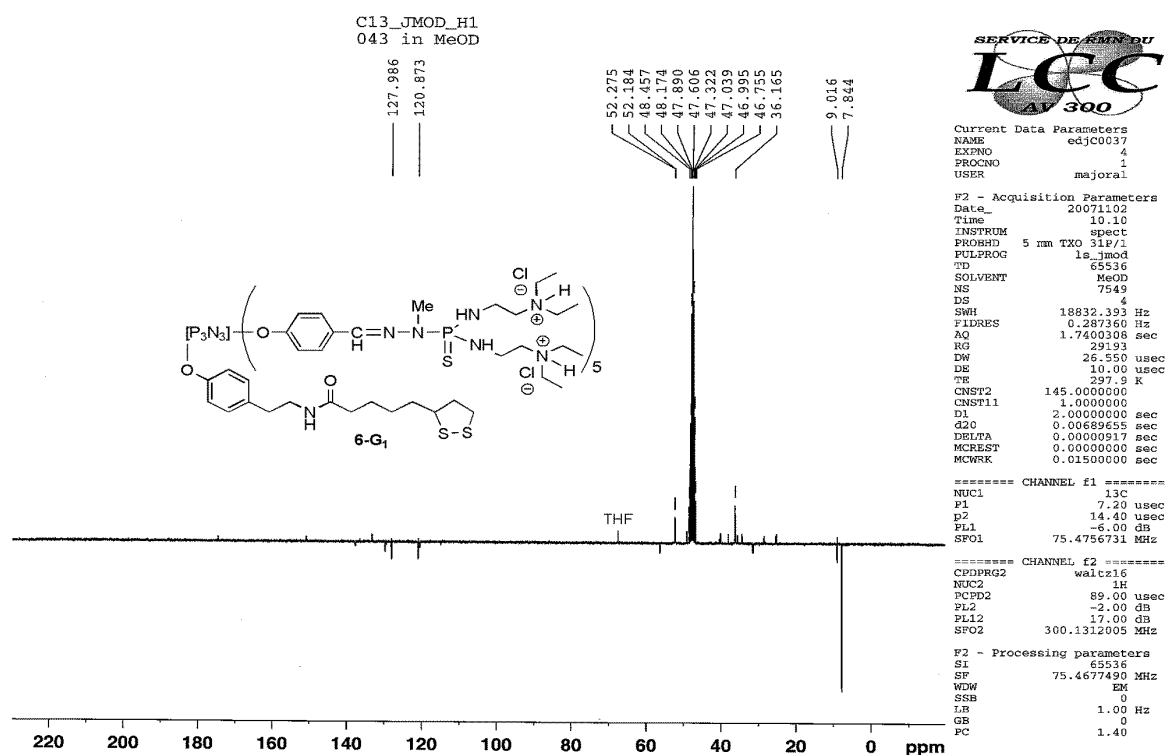

<sup>13</sup>C Jmod NMR spectrum (expanded) of compound **6-G<sub>1</sub>**

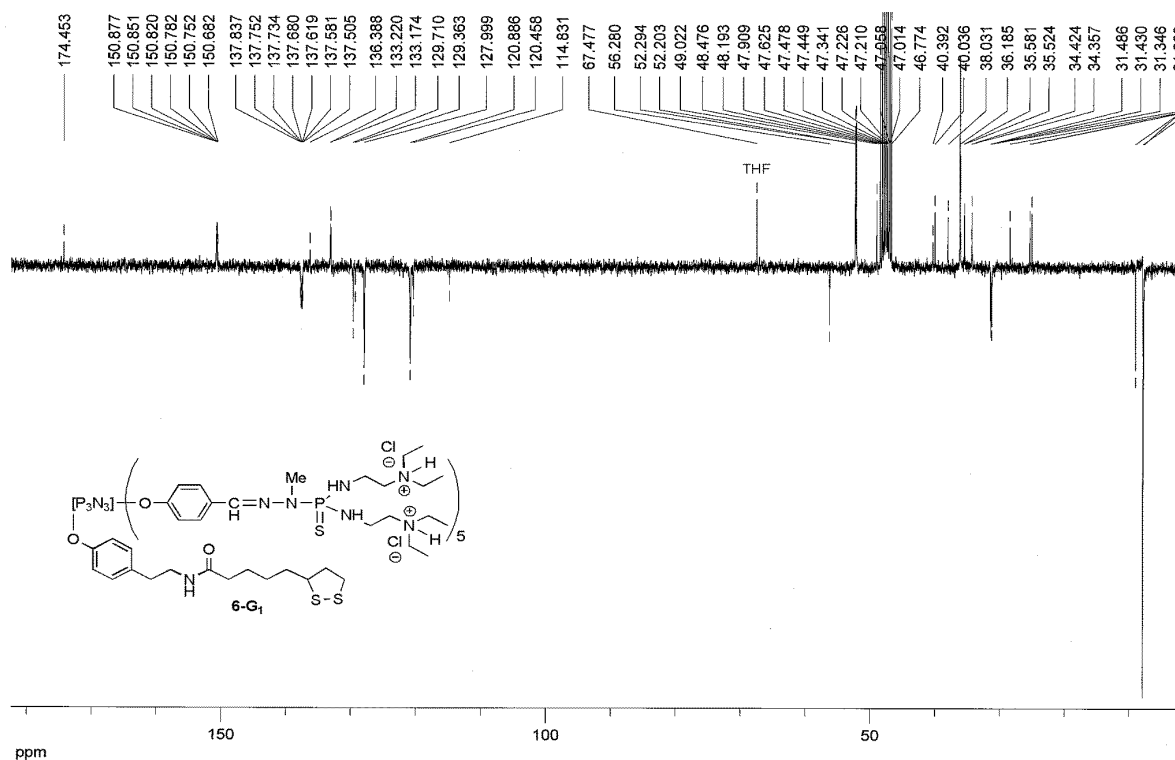

$^{31}\text{P}$   $\{^1\text{H}\}$  NMR spectrum of compound **6-G<sub>2</sub>**

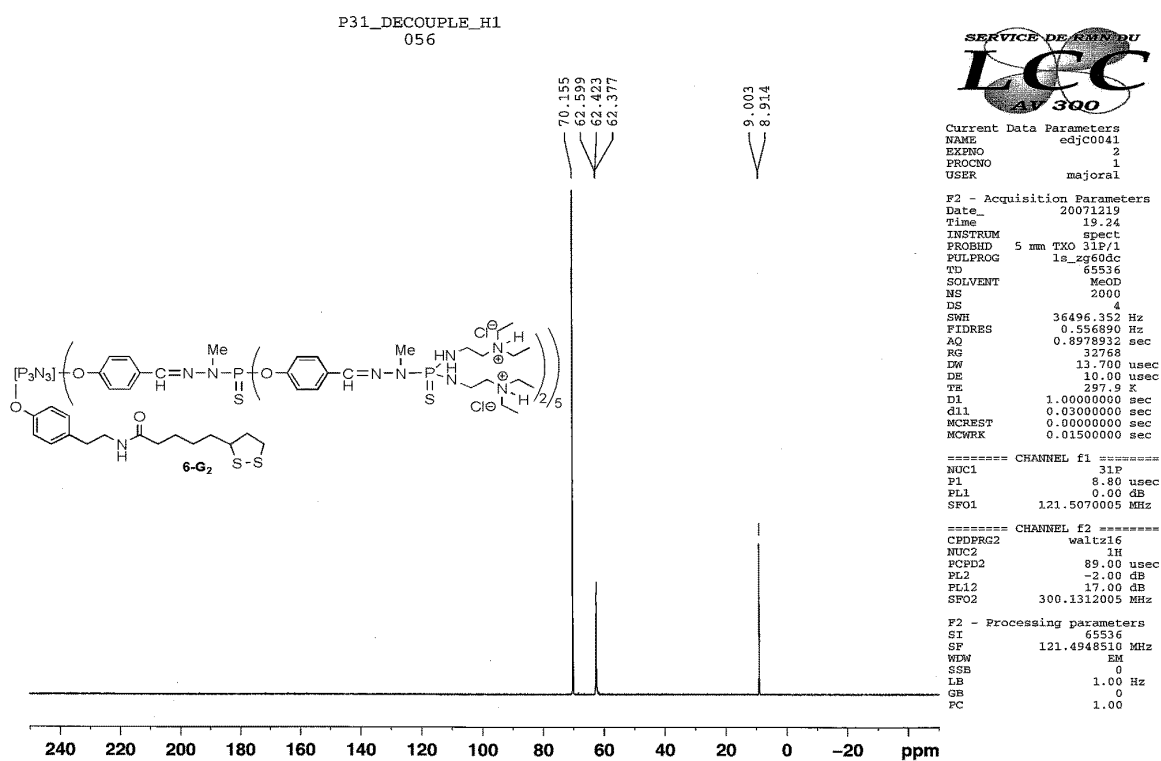

$^1\text{H}$  NMR spectrum of compound **6-G<sub>2</sub>**

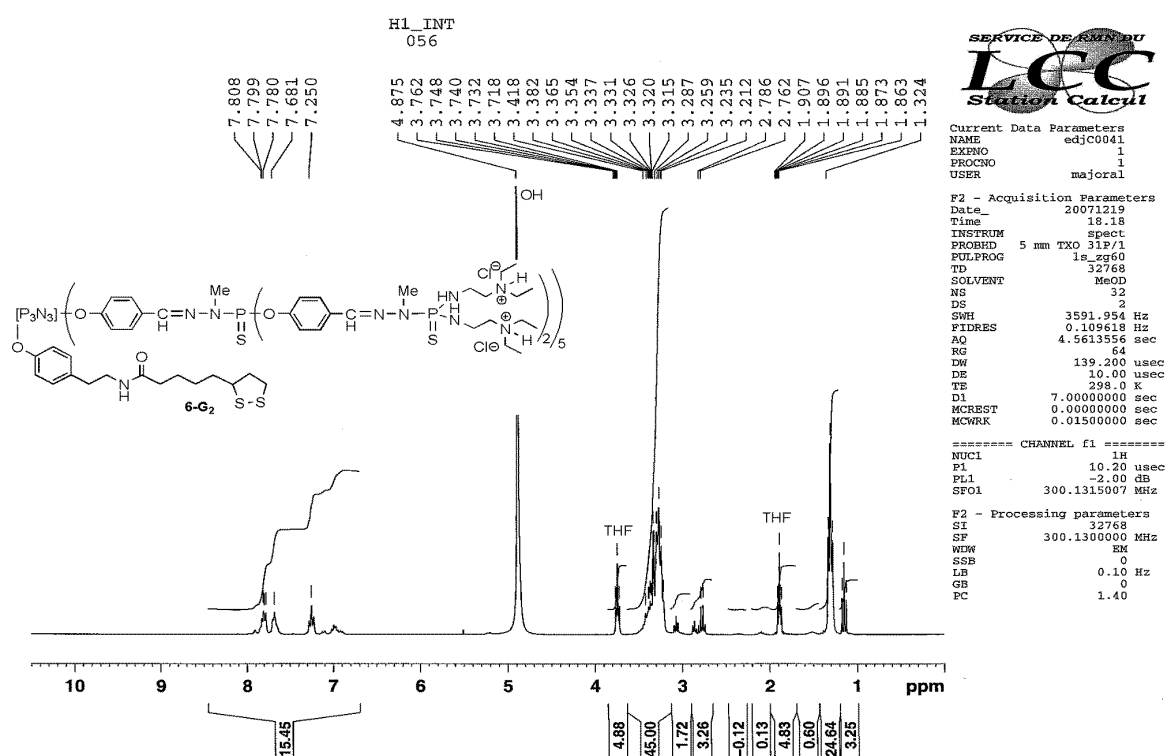

$^{13}\text{C} \{^1\text{H}\}$  NMR spectrum of compound **6-G<sub>2</sub>**

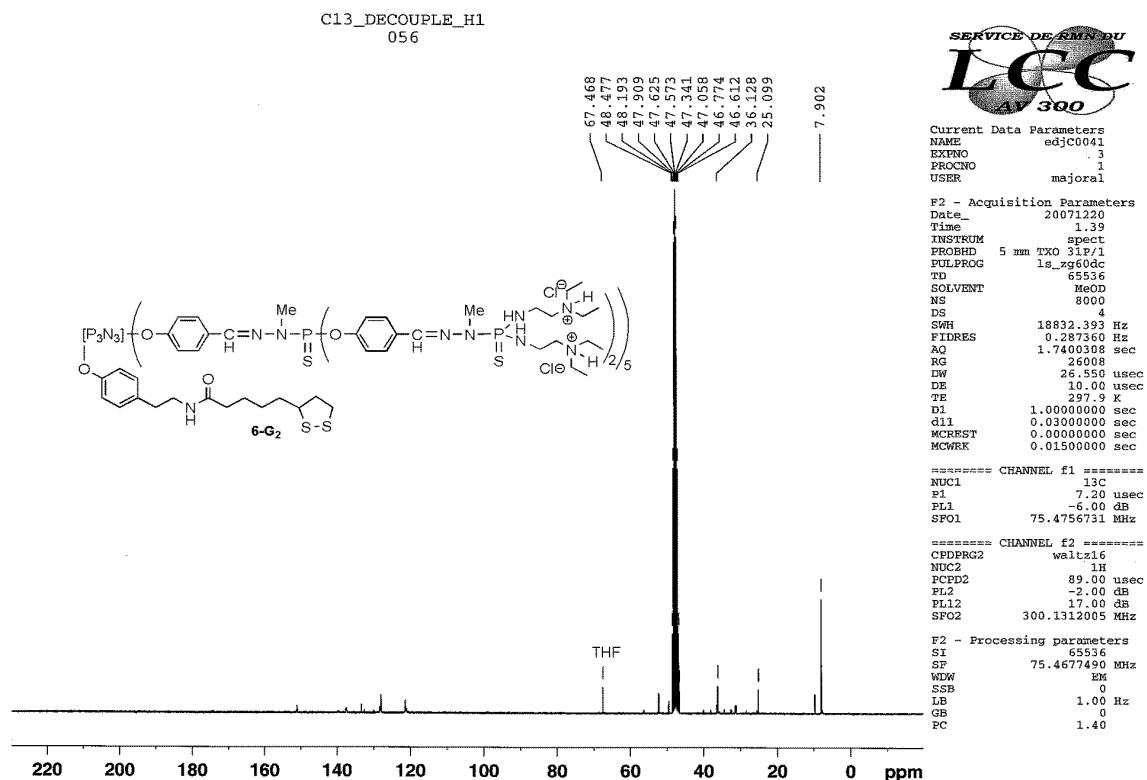

$^{13}\text{C}$  Jmod NMR spectrum of compound **6-G<sub>2</sub>**

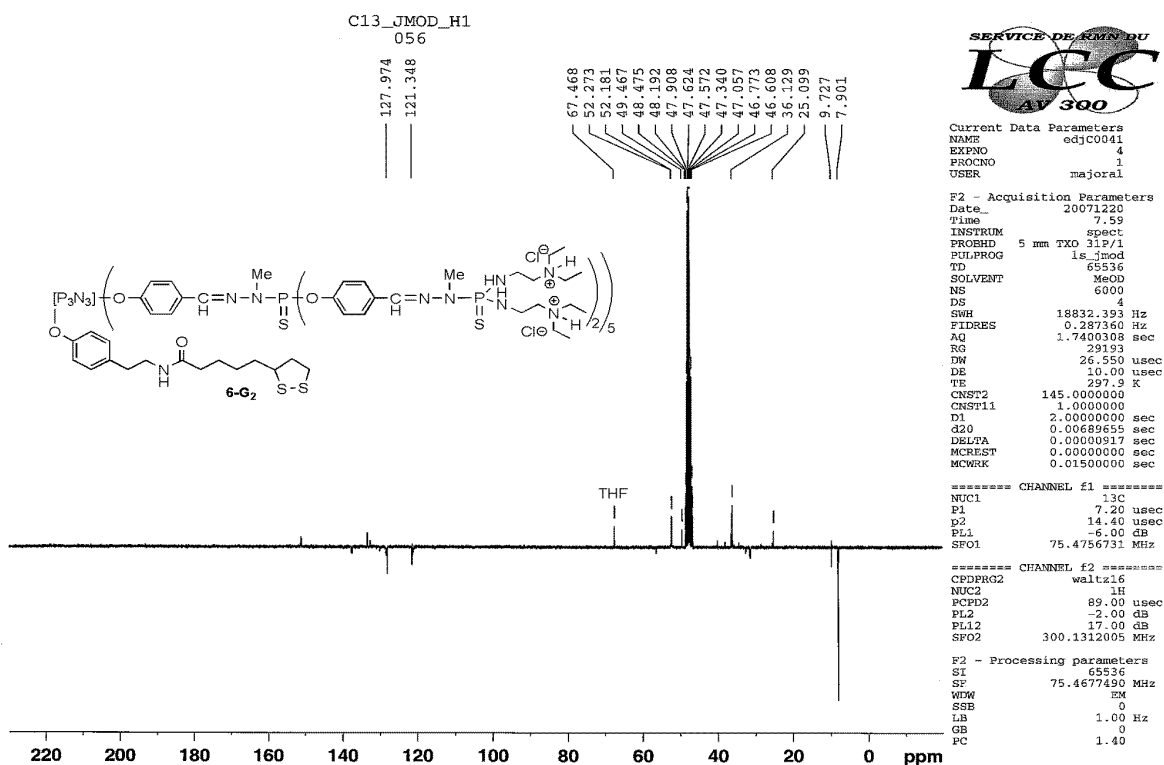



$^{31}\text{P}$   $\{^1\text{H}\}$  NMR spectrum of compound **7-G<sub>1</sub>**

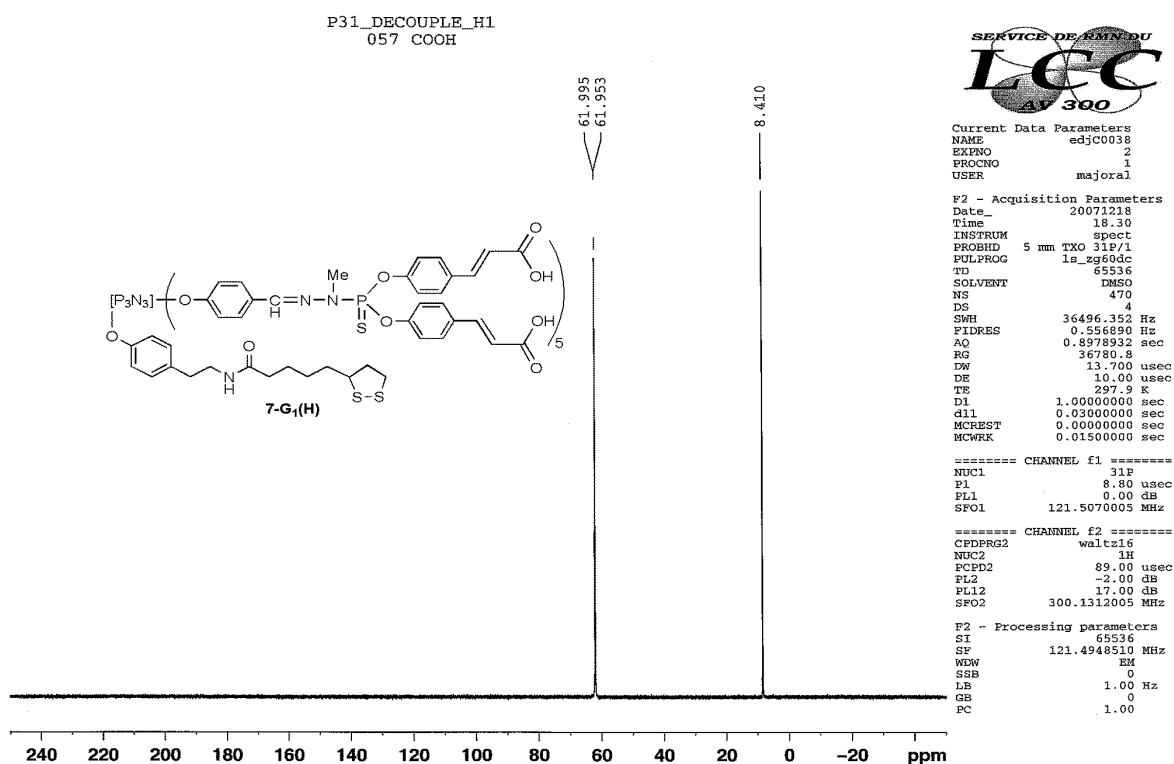

$^1\text{H}$  NMR spectrum of compound **7-G<sub>1</sub>**

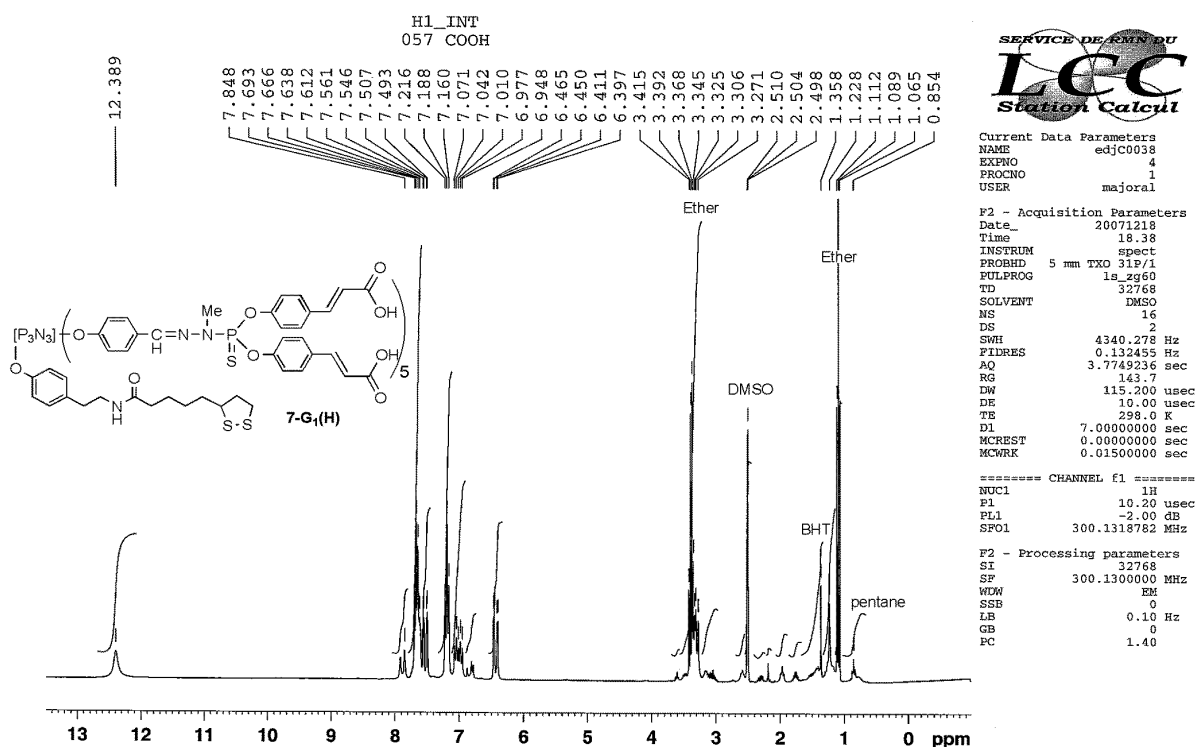

C13\_DECOUPLE\_H1  
057 COOH

167.899  
151.710  
151.651  
151.617  
143.088  
132.194  
130.281  
128.728  
121.633  
121.774  
119.862

65.377

40.821  
40.543  
40.266  
39.988  
39.710  
39.432  
39.153  
38.475  
30.882  
15.628

Current Data Parameters  
NAME edjC0040  
EXPNO 3  
PROCNO 1  
USER majoral

F2 - Acquisition Parameters  
Date\_ 20071219  
Time 2.23  
INSTRUM spect  
PROBHD 5 mm TXO 31P/1  
PULPROG ls\_zg60dc  
TD 65536  
SOLVENT DMSO  
NS 7000  
DS 4  
SWH 18832.393 Hz  
FIDRES 0.287360 Hz  
AQ 1.7400308 sec  
RG 16384  
RW 26.550 usec  
DE 10.00 usec  
TE 297.9 K  
DL 1.00000000 sec  
d11 0.03000000 sec  
MCREST 0.00000000 sec  
MCWRK 0.01500000 sec

===== CHANNEL f1 =====  
NUC1 13C  
P1 7.20 usec  
PL1 -6.00 dB  
SFO1 75.4756731 MHz

===== CHANNEL f2 =====  
CPDPRG2 waltz16  
NUC2 1H  
PCPD2 89.00 usec  
PL2 -2.00 dB  
PL12 17.00 dB  
SFO2 300.1312005 MHz

F2 - Processing parameters  
SI 65536  
SF 75.4677490 MHz  
WDW EM  
SSB 0  
LB 1.00 Hz  
GB 0  
PC 1.40

DMSO

acetone

Ether

Ether

7-G<sub>1</sub>(H)

7-G<sub>1</sub>(H)

C13\_JMOD\_H1  
057 COOH

167.899  
151.709  
151.616  
143.090  
132.415  
132.194  
130.282  
128.728  
121.834  
121.781  
121.379  
113.861

7-G<sub>1</sub>(H)

65.377  
56.510  
40.825  
40.825  
40.545  
40.267  
39.988  
39.709  
39.431  
39.153  
38.474  
34.531  
33.388  
33.294  
33.232  
30.882  
15.628

DMSO

Ether

Ether

ppm

**SERVICE DE RMN DU**

**LCC**

**AV 300**

Current Data Parameters

NAME edjC0040

EXPNO 4

PROCNO 1

USER majoral

F2 - Acquisition Parameters

Date\_ 20071219

Time 7.40

INSTRUM spect

PROBHD 5 mm TKO 31P/1

PULPROG 1s\_jmod

TD 65536

SOLVENT DMSO

NS 5000

DS 4

SH1 18832.393 Hz

FIDRES 0.287360 Hz

AQ 1.7400308 sec

RG 29.193

DW 26.550 usec

DE 10.00 usec

TE 297.9 K

CNST2 145.0000000

CNST11 1.0000000

D1 2.0000000 sec

d20 0.00689655 sec

DELTA 0.00000917 sec

MCREST 0.00000000 sec

MCWRK 0.01500000 sec

===== CHANNEL f1 =====

NUC1 13C

P1 7.20 usec

P2 14.40 usec

PL1 -6.00 dB

SFO1 75.4756731 MHz

===== CHANNEL f2 =====

CDPRG2 waltz16

NUC2 1H

PCPD2 89.00 usec

PL2 -2.00 dB

PL12 17.00 dB

SFO2 300.1312005 MHz

F2 - Processing parameters

SI 65536

SF 75.4677490 MHz

WDW EM

SSB 0

LB 1.00 Hz

GB 0

PC 1.40

# <sup>31</sup>P {<sup>1</sup>H} NMR spectrum of compound 7-G<sub>2</sub>

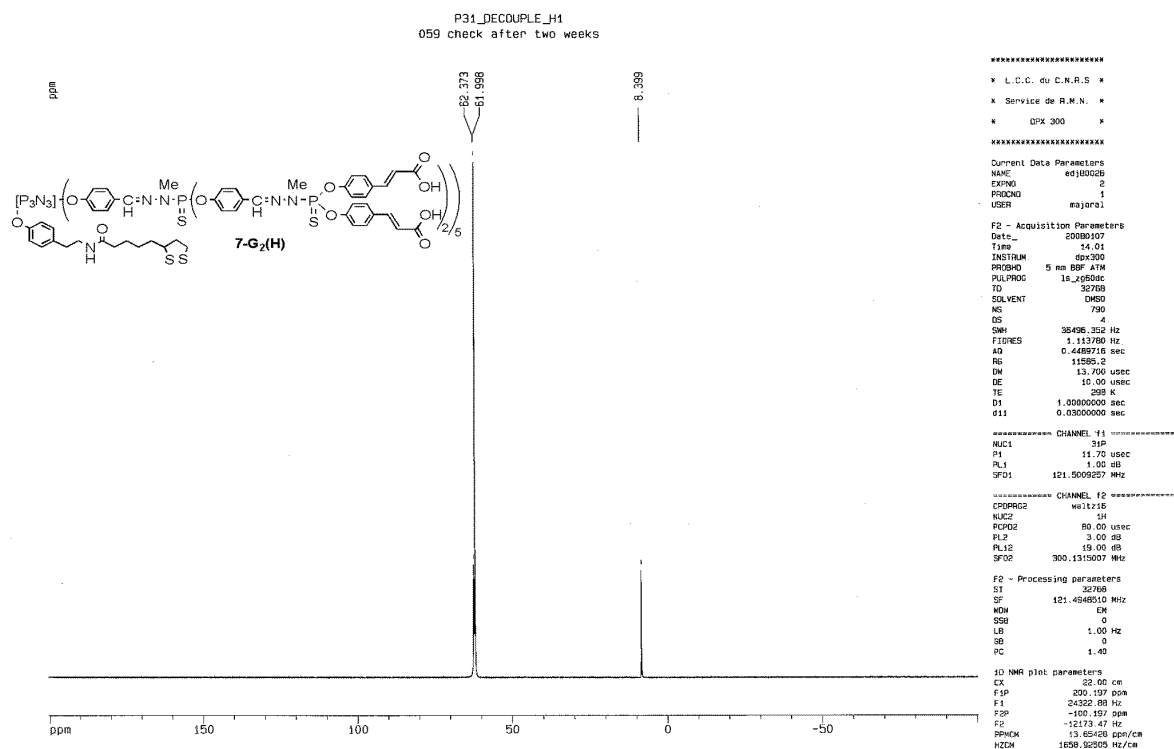

# <sup>1</sup>H NMR spectrum of compound 7-G<sub>2</sub>

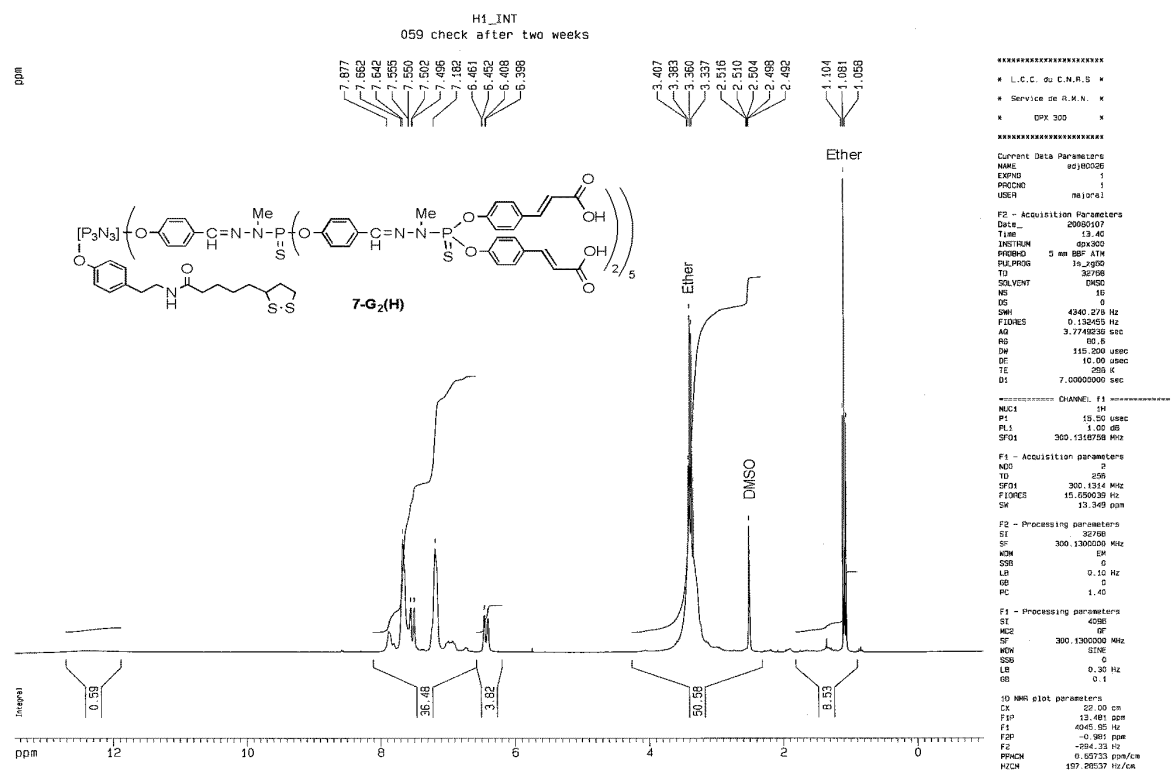

$^{13}\text{C} \{^1\text{H}\}$  NMR spectrum of compound **7-G<sub>2</sub>**

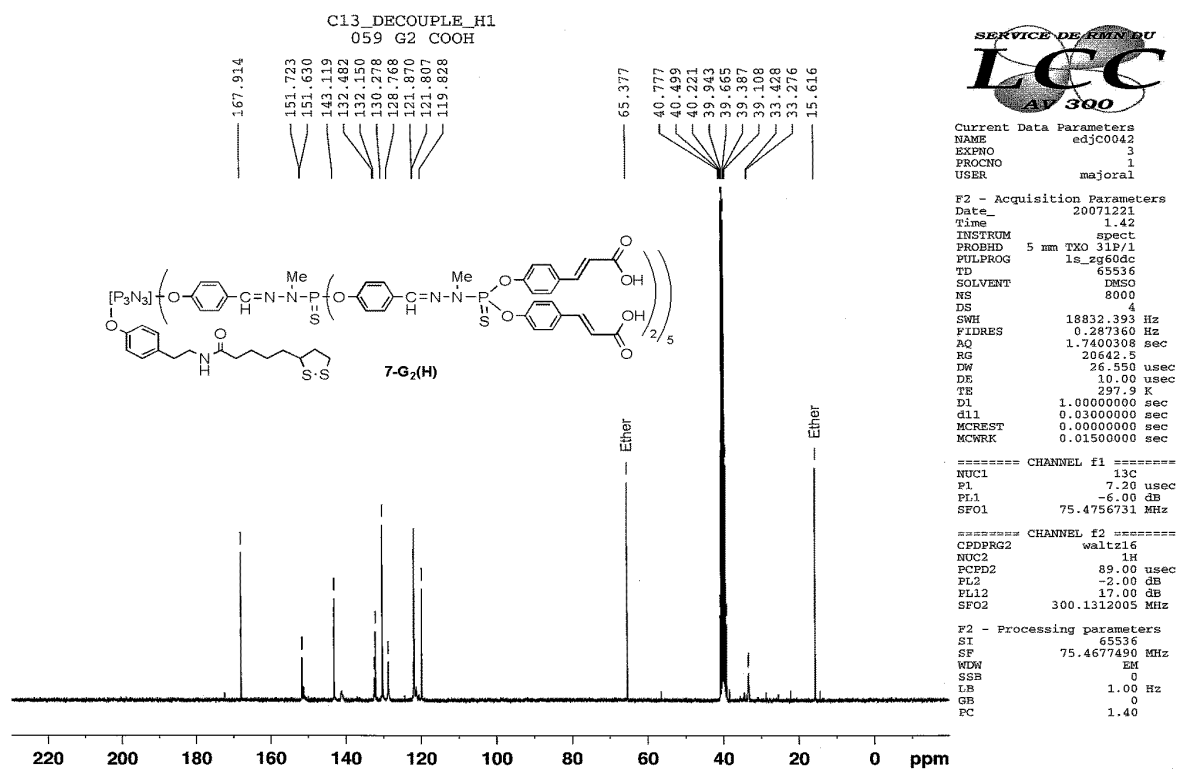

$^{13}\text{C}$  Jmod NMR spectrum of compound **7-G<sub>2</sub>**

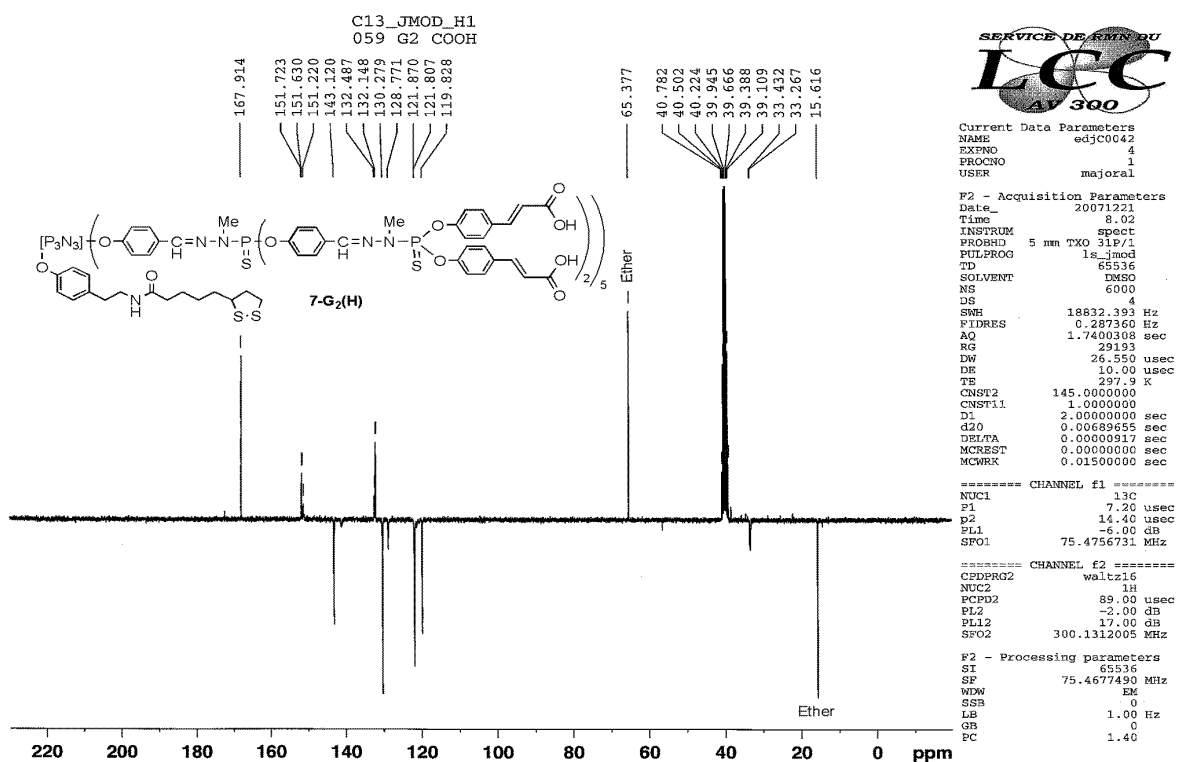

## Contact Angle Goniometry

Water contact angles measured on a non-functionalized gold surface (control) and on gold coated with either **6-G<sub>1</sub>** (G<sub>1</sub>(+)) or **7-G<sub>1</sub>** (G<sub>1</sub>(-)).

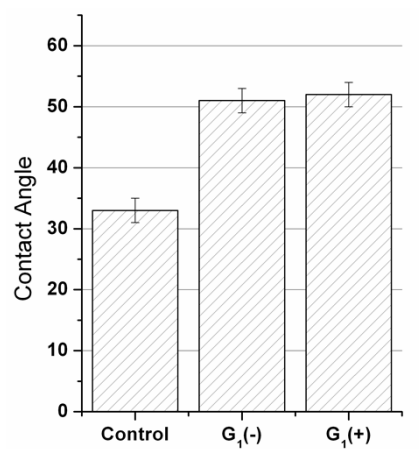

Supplement: c5nj00620a1.pdf [file c5nj00620a1.pdf]
